# Supplementary material for: Examining the predictors of academic outcomes for indigenous Māori, Pacific and rural students admitted into medicine via two equity pathways: a retrospective observational study at the University of Auckland, Aotearoa New Zealand
Source: PubMed Central journal article supplement — BMJ Open. 2017 Aug 27;7(8):e017276. doi: 10.1136/bmjopen-2017-017276 (PMC5724058; doi:10.1136/bmjopen-2017-017276), 2017-08-27
Supplement: bmjopen-2017-017276.draft_revisions.pdf [file bmjopen-2017-017276.draft_revisions.pdf]

# BMJ Open

BMJ Open is committed to open peer review. As part of this commitment we make the peer review history of every article we publish publicly available.

When an article is published we post the peer reviewers' comments and the authors' responses online. We also post the versions of the paper that were used during peer review. These are the versions that the peer review comments apply to.

The versions of the paper that follow are the versions that were submitted during the peer review process. They are not the versions of record or the final published versions. They should not be cited or distributed as the published version of this manuscript.

BMJ Open is an open access journal and the full, final, typeset and author-corrected version of record of the manuscript is available on our site with no access controls, subscription charges or pay-per-view fees (<http://bmjopen.bmj.com>).

If you have any questions on BMJ Open's open peer review process please email [editorial.bmjopen@bmj.com](mailto:editorial.bmjopen@bmj.com)

# BMJ Open

## Widening access: predicting academic success of medical students admitted via two equity pathways

|                                    |                                                                                                                                                                                                                                                                                                                                                                                                                                                                                                                                                                                                                                                                     |
|------------------------------------|---------------------------------------------------------------------------------------------------------------------------------------------------------------------------------------------------------------------------------------------------------------------------------------------------------------------------------------------------------------------------------------------------------------------------------------------------------------------------------------------------------------------------------------------------------------------------------------------------------------------------------------------------------------------|
| Journal:                           | <i>BMJ Open</i>                                                                                                                                                                                                                                                                                                                                                                                                                                                                                                                                                                                                                                                     |
| Manuscript ID                      | bmjopen-2017-017276                                                                                                                                                                                                                                                                                                                                                                                                                                                                                                                                                                                                                                                 |
| Article Type:                      | Research                                                                                                                                                                                                                                                                                                                                                                                                                                                                                                                                                                                                                                                            |
| Date Submitted by the Author:      | 12-Apr-2017                                                                                                                                                                                                                                                                                                                                                                                                                                                                                                                                                                                                                                                         |
| Complete List of Authors:          | Curtis, Elana; University of Auckland, Te Kupenga Hauora Māori<br>Wikaire, Erena; University of Auckland, Te Kupenga Hauora Māori<br>Jiang, Yannan; The University of Auckland, Department of Statistics<br>McMillan, Louise; The University of Auckland, Department of Statistics<br>Loto, Robert; University of Auckland, Te Kupenga Hauora Māori<br>Poole, Phillipa; University of Auckland, Department of Medicine<br>Barrow, Mark; The University of Auckland, Deanery, Faculty of Medical and<br>Health Sciences<br>Bagg, Warwick; University of Auckland, Medical Programme Directorate<br>Reid, Papaarangi; University of Auckland, Te Kupenga Hauora Māori |
| <b>Primary Subject<br>Heading</b>: | Public health                                                                                                                                                                                                                                                                                                                                                                                                                                                                                                                                                                                                                                                       |
| Secondary Subject Heading:         | Medical education and training                                                                                                                                                                                                                                                                                                                                                                                                                                                                                                                                                                                                                                      |
| Keywords:                          | academic outcomes, equity admission, medicine, indigenous, rural                                                                                                                                                                                                                                                                                                                                                                                                                                                                                                                                                                                                    |
|                                    |                                                                                                                                                                                                                                                                                                                                                                                                                                                                                                                                                                                                                                                                     |

SCHOLARONE™  
Manuscripts

Only

1  
2  
3  
4  
5  
6 **Widening access: predicting academic success of medical students admitted**  
7 **via two equity pathways**  
8

9  
10 Elana Curtis<sup>1§</sup>, Erena Wikaire<sup>1</sup>, Yinnan Jiang<sup>2</sup>, Louise McMillan<sup>2</sup>, Robert Loto<sup>1</sup>, Phillippa  
11 Poole<sup>3</sup>, Mark Barrow<sup>4</sup>, Warwick Bagg<sup>5</sup>, Papaarangi Reid<sup>1</sup>  
12

13  
14 <sup>1</sup>Te Kupenga Hauora Māori, Faculty of Medical and Health Sciences, University of Auckland,  
15 Private Bag 92015, Auckland, New Zealand

16  
17 <sup>2</sup> Department of Statistics, Faculty of Science, University of Auckland, Private Bag 92015,  
18 Auckland, New Zealand

19  
20 <sup>3</sup> Department of Medicine, Faculty of Medical and Health Sciences, University of Auckland,  
21 Private Bag 92015, Auckland, New Zealand

22  
23 <sup>4</sup> Deanery, Faculty of Medical and Health Sciences, University of Auckland, Private Bag  
24 92015, Auckland, New Zealand

25  
26 <sup>5</sup> Medical Programme Directorate, Faculty of Medical and Health Sciences, University of  
27 Auckland, Private Bag 92015, Auckland, New Zealand

28  
29 <sup>§</sup> Corresponding author. Email addresses: e.curtis@auckland.ac.nz  
30  
31  
32  
33  
34  
35  
36  
37  
38  
39  
40  
41  
42  
43  
44  
45  
46  
47  
48  
49  
50  
51  
52  
53  
54  
55  
56  
57  
58  
59  
60

## Abstract

**Objective** To determine associations between admission markers of socio-economic status, transitioning, bridging programme attendance and prior academic preparation on academic outcomes for indigenous Māori, Pacific and rural students admitted into medicine under access pathways designed to widen participation. Findings were compared to students admitted via the general (usual) admission pathway.

**Design** Retrospective observational study using secondary data.

**Setting** 6-year medical programme (MBChB), University of Auckland, Aotearoa New Zealand. Students are selected and admitted into Year 2 following a first year (undergraduate) or prior degree (graduate).

**Participants** 1,676 domestic students admitted into Year 2 between 2002-2012 via three pathways: GENERAL admission (1,167), Māori and Pacific Admission Scheme – MAPAS (317) or Rural Origin Medical Preferential Entry – ROMPE (192). Of these, 1,082 students completed the programme in the study period.

**Main outcome measures** Graduated from medical programme (yes/no), academic scores in Years 2-3 (Grade Point Average, scored 0-9).

**Results** 735/778 (95%) of GENERAL, 111/121 (92%) of ROMPE and 146/183 (80%) of MAPAS students graduated from intended programme. The graduation rate was significantly lower in the MAPAS students ( $p < 0.0001$ ). The average Year 2-3 GPA was 6.35 (SD 1.52) for GENERAL, which was higher than 5.82 (SD 1.65,  $p = 0.0013$ ) for ROMPE and 4.33 (SD 1.56,  $p < 0.0001$ ) for MAPAS. Multiple regression analyses identified three key predictors of better academic outcomes: bridging programme attendance, admission as an undergraduate and admission GPA/GPE. Attending local urban schools and higher school deciles were also associated with a greater likelihood of graduation. All regression models have controlled for pre-defined baseline confounders (gender, age and year of admission).

**Conclusions** There were varied associations between admission variables and academic outcomes across the three admission pathways. Equity-targeted admission programmes inclusive of variations in academic threshold for entry may support a widening participation agenda, however, additional academic and pastoral supports are recommended.

## Article Summary

### Strengths and limitations of this study

- Most comprehensive quantitative analysis of academic outcomes for equity admission pathways into medicine within NZ.
- Examines one of the largest cohorts of indigenous medical students available internationally.
- Confined to a single medical programme and results may not be generalisable to other programmes or tertiary institutions.
- The use of secondary school decile as a proxy for socio-economic position relies on an area-level indicator of deprivation and may not directly reflect the socio-economic position of each individual student or their family.
- This study did not explore the effect of medical interview outcomes due to different processes of selection being used across equity and general admission pathways.

## Introduction

Widening participation in the medical profession remains a priority for many countries worldwide.<sup>1,2</sup> Most medical schools acknowledge the need to embrace a widening participation agenda in order to contribute to the development of a health workforce that reflects a community's ethnic, cultural, geographic and socio-economic diversity.<sup>3,4</sup> Health workforce diversity is expected to reduce inequities in health outcomes through enhanced patient-provider interactions,<sup>5,6</sup> increased provision of culturally competent care<sup>7</sup> and better delivery to high-need, underserved population groups.<sup>8,9</sup> In addition to workforce and healthcare delivery benefits, increasing diversity within medical school classes has been associated with positive effects on the medical school context itself including enhanced educational experiences for all students,<sup>10,11</sup> positive student attitudes towards the value of diversity within medicine,<sup>12</sup> and the creation of learning contexts that challenge stereotypes and reduce implicit bias of medical students towards under-represented minorities.<sup>13</sup> Widening participation interventions have been successful at increasing medical school diversity for under-represented ethnic minorities, women and rural students; however, disparities by socioeconomic status remain, as reported in the United Kingdom (UK).<sup>14</sup> Despite the strong rationale and increasing evidence of effectiveness,<sup>4,15</sup> interventions to widen participation, such as medical school quotas, regularly come under attack and are criticised for lowering academic and quality standards.<sup>16,17</sup> Comprehensive data analyses that not only measure outcome differences by admission pathways, but also attempt to examine the likely predictors for any observed differences, are needed.<sup>18</sup> This information is expected to better inform the widening participation debate and assist institutions to provide appropriate recruitment and tertiary support interventions for students admitted under equity-targeted admission pathways.

This study explores the predictors of both short- and long-term academic outcomes for (a) indigenous Māori or Pacific students and (b) rural background students admitted into the medical programme (MBChB) under equity admission pathways, compared to general admission at the Faculty of Medical and Health Sciences (FMHS), University of Auckland (UoA), Aotearoa New Zealand (NZ). This is one of two medical schools in NZ, based in a city of over 1.2 million, about a third of the nation's population. Entry into the MBChB at UoA may occur in two ways as: (1) an undergraduate within the first year of a health sciences or biomedical sciences degree at the UoA or (2) as a graduate with a completed undergraduate or postgraduate qualification. Both pathways equate to 'Year 1' of the MBChB degree at the UoA. The Māori and Pacific Admission Scheme (MAPAS) commenced in 1972 in response to Māori and Pacific health workforce shortages, significant inequities in health outcomes and the indigenous rights of Māori within NZ.<sup>19</sup> MAPAS involves comprehensive recruitment and retention interventions delivered within culturally appropriate contexts of support with approximately 240 MAPAS medical students enrolled in 2017 (approximately 20% of the total cohort).<sup>19,20</sup> The Rural Origin Medical Preferential Entry (ROMPE) pathway began in 2004, in response to NZ government prioritisation of rural healthcare needs and evidence that students from rural backgrounds are more

1  
2  
3 likely to return to practice in rural regions.<sup>21</sup> ROMPE initially offered 20 places to students of rural  
4 origin per year. <sup>22</sup> The number of places available on each pathway has increased with increasing  
5 student class sizes and NZ population proportions. Students may apply for only one pathway. The  
6 selection tools used to rank GENERAL and ROMPE students for entry include a measure of prior  
7 academic performance (60%), medical entry interview (25%) and score on the Undergraduate  
8 Medical and Health Sciences Admission Medical Test (UMAT), an aptitude test (15%). MAPAS  
9 selection during the study period consisted of a measure of prior academic performance and an  
10 assessment via a MAPAS-specific interview. <sup>19</sup>

11  
12  
13  
14  
15  
16 Over the first 20 years of MAPAS (i.e. 1972-1992), there was a higher withdrawal rate for MAPAS  
17 medical students compared to other students admitted; however, the reasons for these findings are  
18 unclear and no associations between likely predictor variables and academic outcomes have been  
19 investigated to date. <sup>23</sup> We hypothesise that markers of socio-economic status, transition factors,  
20 bridging programme attendance (implemented specifically for Māori and Pacific students aspiring to  
21 enter medicine from 1999) and prior academic preparation, are likely to impact on both short-term  
22 i.e. year 2-3 Grade Point Average (GPA) and long-term i.e. graduation outcomes. This study aimed to  
23 examine the association between admission variables and academic outcomes for students admitted  
24 into the medical programme under equity admission pathways in comparison to those students  
25 admitted under the general (usual) admission pathway.

## 32 **Methods**

### 33 *Study Design*

34  
35 A retrospective observational study design was used to analyse data from all domestic students  
36 entering Year 2 MBChB at the UoA between 2002 and 2012 (with graduation data inclusive of  
37 academic outcomes from 2013). International students were excluded from analysis. Individual  
38 student demographic, admission and academic results data were sourced from Student Services  
39 Online (SSO), the UoA's web-based centralised student data management system, and the Medical  
40 Programme Directorate (MPD) within the FMHS. The study period reflects the availability of  
41 electronic data from these sources and the time required for students to have graduated from a 6-  
42 year medical programme at the time this study commenced. A Kaupapa Māori Research (KMR)  
43 framework, supplemented by Pacific research methodology, was used throughout all aspects  
44 including study design, data collection, data analysis and research dissemination.<sup>24 25</sup> This approach  
45 includes: a commitment to ensuring that the research outputs will have positive benefits for Māori  
46 and Pacific participants and communities; an explicit challenge to reject 'victim blame' and 'cultural  
47 deficit' analyses when interpreting data; <sup>26</sup> and ensuring that any recommendations made from the  
48 research aim to facilitate participant academic success. This broad approach is expected to provide  
49 benefit for all study participants. The study was approved by the UoA Human Participants Ethics  
50 Committee (UAHPEC) (Reference 8110).

### *Predictor Variables*

Participants were identified by their admission category (MAPAS, ROMPE, GENERAL). The decile rating of secondary school attended was used as a proxy measure of socioeconomic status: low (1 – 3) (high deprivation), medium (4 – 7), and high (8 – 10) (low deprivation).<sup>27 28</sup> High decile schools have a high proportion of students who reside in areas of low deprivation (high socioeconomic status). Attended school in Auckland (yes, no) and admitted into Year 1 as a school leaver (yes, no) were used to measure transitioning effects i.e. impact of relocation to Auckland City (the largest city in NZ with a population of 1.4 million where the UoA medical programme is based) and impact of beginning tertiary study as a mature student or school leaver entrant. School leaver (SL) is defined as enrolment in bachelor level study in the year immediately following secondary school. Completion of a UoA bridging foundation programme (yes, no) that aims to bridge the ‘gaps’ between secondary and tertiary education contexts was recorded. The entry pathway into Year 2 MBChB was recorded as graduate or undergraduate. Academic preparation for medical entry was measured by the GPA or Grade Point Equivalent (GPE) at the time of admission for undergraduate and graduate applicants respectively (0-9 representing Fail to A+ average grade).

### *Outcome variables*

Two outcome variables were included in this study: Graduated from MBChB (yes, no) and MBChB Year 2-3 GPA (0-9). Graduated from MBChB represents a long-term academic outcome and was only applied to those students who completed the MBChB programme by 2013 i.e. students admitted between 2002-2009. The Year 2-3 GPA represents a short-term academic outcome associated with the two pre-clinical years of the MBChB programme. Data for this measure were available for a larger cohort of current and graduated students i.e. students admitted between 2002 and 2012. The Year 2-3 GPA represents the average GPA achieved across Years 2 and 3 for students admitted between 2002 and 2011 and the GPA achieved across year 2 only for students admitted in 2012.

### *Analysis*

Statistical analysis was performed using SAS version 9.4 (SAS Institute Inc., Cary, NC, USA). All statistical tests were two-sided at a 5% significance level. A full statistical analysis plan was developed a priori that incorporated baseline confounders, key predictor and outcome variables of interest, based on concepts identified from relevant health workforce development and tertiary education literature as well as experience within the FMHS context as to the factors likely to impact on student success (Figure 1). Multiple regression analyses with stepwise model selection were used to test the associations between predictor variables and academic outcomes for the total cohort (i.e. MAPAS, ROMPE and GENERAL admission combined) and via entry admission sub-cohorts (i.e. MAPAS and GENERAL). The results on ROMPE were not included due to small number of students in the study cohort.



1  
2  
3  
4 [Insert Figure 1]  
5  
6

7  
8 The baseline model has controlled for pre-defined confounders including gender, age, and year of  
9 admission into Year 2 MBChB (Model 1) with the addition of predictor variables representing the  
10 sequential effect of socioeconomic status (Model 2), transitioning (Model 3), bridging programme  
11 (Model 4) and academic preparation (Model 5) on academic outcomes. Each model was initially run  
12 with all the pre-specified predictors of interest, and those predictors that were significant at the 5%  
13 level were retained in the final model. This analysis was applied to all students admitted under  
14 MAPAS, ROMPE and GENERAL categories, with the outcome variables assessed at the time of data  
15 collection. For MBChB Year 2-3 GPA, the mean difference was reported with 95% confidence interval  
16 (CI) using the linear regression model. For Graduation outcome (yes/no), the odds ratio (OR) was  
17 reported with 95% CI using logistic regression model. Similar regression analyses were conducted on  
18 the two largest sub-cohorts for MAPAS and GENERAL categories separately, in order to identify  
19 significant predictors of academic outcomes specific to that sub-cohort. Ethnicity was added to the  
20 baseline model in the sub cohort analyses for MAPAS (Māori, Pacific) and GENERAL (Māori, Pacific,  
21 Asian, European/Pākehā, Other/Missing). Missing data were reported in the descriptive summary, but  
22 excluded in final regression analysis  
23  
24  
25  
26  
27  
28  
29

### 30 31 **Results**

32 A total of 1,676 students were included in the study, representing 1,167 (70%) GENERAL, 317 (19%)  
33 MAPAS and 192 (11%) ROMPE admission categories. Cohort demographics are presented in Tables 1  
34 and 2.  
35  
36

37  
38 [Insert Table 1 and Table 2]  
39  
40

41 The MAPAS category differs in comparison to the GENERAL category by ethnicity (59% Māori, 41%  
42 Pacific, 0.3% Asian, 0.3% Other,  $p < 0.0001$ ), school decile (42% high, 34% medium and 20% low,  
43  $p < 0.0001$ ), having attended an Auckland school (60%,  $p < 0.0001$ ) and being admitted into medicine as a  
44 school leaver (50%,  $p < 0.0001$ ). The average admission GPA/GPE was approximately 2 points lower for  
45 MAPAS compared to GENERAL admission category students (6.22, SD 1.19,  $p < 0.0001$ ). The ROMPE  
46 category differs in comparison to the GENERAL category by mean age (21.5, SD 4.55,  $p < 0.0001$ ),  
47 gender (61.5% female,  $p < 0.017$ ), ethnicity (84% European/Pākehā, 11% Asian, 1% Māori, 1% Pacific,  
48 2% Other,  $p < 0.0001$ ), school decile (43% high, 43% medium, 7% low,  $p < 0.0001$ ), having attended an  
49 Auckland school (30%,  $p$ -value  $< 0.0001$ ), admission into first year as a school leaver (59%,  $p < 0.0001$ )  
50 and entry pathway into medicine (31% graduate, 69% undergraduate,  $p$ -value  $< 0.0002$ ). The average  
51 admission GPA/GPE was approximately half a point lower for ROMPE compared to GENERAL students  
52 (7.74, SD 1.19,  $p < 0.0001$ ).  
53  
54  
55  
56  
57  
58  
59  
60

1  
2  
3  
4 Of the 1,082 students who completed the programme in the study period (i.e. admitted between  
5 2002-2009), 95% (735/778) of GENERAL, 92% (111/121) of ROMPE and 80% (146/183) of MAPAS  
6 students graduated from MBChB. For the total cohort (admitted between 2002-2012), the mean Year  
7 2-3 GPA was 6.35 (SD 1.52) for GENERAL, 5.82 (SD 1.65,  $p=0.0013$ ) for ROMPE and 4.33 (SD 1.56,  
8  $p<0.0001$ ) for MAPAS students. Table 3 presents the multiple regression analysis findings for the  
9 Total Cohort.  
10  
11  
12

13  
14  
15 [Insert Table 3]  
16  
17

#### 18 *Graduated from Medicine*

19 In the unadjusted model, MAPAS students had significantly lower odds of graduating from intended  
20 programme compared to GENERAL students (OR:0.231, 95% CI:0.144-0.371). This pattern remained  
21 after controlling for age, gender and year of admission i.e. Model 1 (OR:0.235, CI:0.143-0.386). The  
22 odds of MAPAS students graduating in comparison to GENERAL students improved with the addition  
23 of medium and low school decile i.e. Model 2 (OR:0.291, CI:0.165-0.513), and having attended a  
24 school out of Auckland or being admitted into first year as a school leaver i.e. Model 3 (OR:0.296,  
25 CI:0.166-0.526,  $p=0.0002$ ). The addition of having attended a bridging programme increased the odds  
26 of MAPAS students graduating from medicine by a further 14% in comparison to GENERAL students  
27 i.e. Model 5 (OR:0.440, CI:0.231-0.841). When entry pathway into medicine as a graduate and  
28 admission GPA/GPE were added to the analysis i.e. Model 5, the difference in odds of graduating  
29 between admission categories became non-significant (OR:1.680, CI: 0.736-3.833). These findings  
30 suggest that attending a higher decile school, a school outside of Auckland and admission into first  
31 year as a mature student each make a small contribution to the observed difference in graduation  
32 between MAPAS and GENERAL students. However, having attended a bridging/foundation  
33 programme prior to medical school entry had a stronger association with improved graduation  
34 outcome. In addition, both graduate entry admission and admission GPA/GPE are important  
35 contributors, after controlling for which the observed difference between the MAPAS and GENERAL  
36 students was no longer statistically significant.  
37  
38  
39  
40  
41  
42  
43  
44  
45

46  
47 No statistically significant difference was observed in graduation outcome between the ROMPE and  
48 GENERAL students when all predictor variables were taken into account i.e. Model 5 (OR:0.558,  
49 CI:0.227-1.374).  
50  
51

#### 52 *Year 2-3 GPA*

53 In the unadjusted model, the average Year 2-3 GPA was nearly 2 points lower for MAPAS compared to  
54 GENERAL students (-1.934, CI:-2.112 to -1.756). This pattern remained after controlling for age,  
55 gender and year of admission i.e. Model 1 (-1.994, CI:-2.169 to -1.819) and school decile i.e. Model 2  
56  
57  
58  
59  
60

1  
2  
3 (-1.936, CI:-2.122 to -1.75). Having attended an Auckland school and being admitted into first year as  
4 a mature student reduced the difference in GPA slightly i.e. Model 3 (-1.899, CI:-2.076 to -1.702).  
5 Having attended a bridging programme prior to medical study further reduced the difference in GPA  
6 between MAPAS and GENERAL students i.e. Model 4 (-1.724, CI: -1.914 to -1.533). When both  
7 graduate entry admission and admission GPA/GPE were added in Model 5, no significant difference in  
8 Year 2-3 GPA was observed between the admission categories (0.103, CI:-0.103 to 0.309). These  
9 findings suggest that having attended a bridging programme, entering medicine as a graduate and a  
10 higher admission GPA/GPE are associated with improved performance for MAPAS compared to  
11 GENERAL students in the early years of the medical programme.  
12  
13  
14  
15

16  
17  
18 In the unadjusted model, the average difference between Year 2-3 GPA was approximately half a  
19 point lower for ROMPE compared to GENERAL students (-0.449, CI:-0.668 to -0.23). This general  
20 pattern remains for Models 1-4. When all predictor variables were taken into account in Model 5, the  
21 mean difference in Year 2-3 GPA became non-significant (-0.142, CI: -0.326 to 0.043). These findings  
22 suggest that admission as a graduate and admission GPA/GPE are the major contributors to the GPA  
23 difference between ROMPE and GENERAL students.  
24  
25  
26  
27

28 Table 4 presents the multiple regression analysis findings for the sub-cohort analyses for the MAPAS  
29 and GENERAL cohorts.  
30  
31

32 [Insert Table 4]  
33  
34

#### 35 *MAPAS Sub-Cohort*

36 After controlling for pre-defined confounders (e.g. gender, age, ethnicity, year of admission) and all  
37 significant predictors, i.e. Model 5, the odds of a MAPAS student graduating from medicine was 86%  
38 lower for those MAPAS students who attended a bridging programme versus those who did not (OR:  
39 0.141, CI: 0.042-0.468, p=0.0014) and 83% lower for MAPAS students who entered medicine via the  
40 graduate pathway versus the undergraduate pathway (OR: 0.170, CI: 0.043-0.681, p=0.0123). The  
41 odds of graduating increased by 1.8 times for every point increase in admission GPA/GPE (OR:1.758,  
42 CI:1.05-2.944, p=0.0319). There were mixed findings for school decile across the models and this  
43 variable was not significant in the final model that included admission GPA/GPE and entry pathway.  
44  
45  
46  
47  
48

49  
50 For MAPAS students, the year 2-3 GPA was similar for students regardless of whether or not they had  
51 attended a bridging programme (-0.927, CI:-1.209 to 0.645, p<0.0001) and was 25% higher for every  
52 point increase in admission GPA/GPA (0.754, CI: 0.647-0.861, p<0.0001). School decile rating was not  
53 a significant predictor in the final model for the MAPAS cohort.  
54  
55  
56  
57  
58  
59  
60

### GENERAL Sub-Cohort

After controlling for pre-defined confounders (e.g. gender, age, ethnicity, year of admission) and all significant predictors, the odds of a GENERAL student graduating from medicine was lower for students who attended a low decile (OR: 0.137, CI: 0.031-0.6,  $p=0.0098$ ) or medium decile school (OR: 0.384, CI: 0.164-0.898,  $p=0.0098$ ) compared to high school decile. Increasing admission GPA/GPE was strongly associated with increased odds of graduating (OR: 2.020, CI: 1.46-2.796,  $p<0.0001$ ). The Year 2-3 GPA was lower for graduate entry GENERAL students compared to undergraduate entry (0.577, CI: 0.377-0.777,  $p=0.0036$ ) with similar outcomes observed for bridging programme attendance (-1.083, CI: -1.182 to -0.355,  $p=0.0036$ ) and admission GPA/GPE (0.977, CI: 0.891-1.063,  $p<0.0001$ ). School decile rating was not a significant predictor of early academic outcomes for the GENERAL cohort.

### Discussion

This study, based on 1676 medical students over a 10 year period compared outcomes and predictor variables of those admitted via two equity-admission pathways with those in the general admission pathway. To our knowledge, this is the first report in the literature describing programme level outcomes to this detail. The descriptive data confirm that it is possible to admit significant numbers of students via these pathways, and have most successfully complete the programme. Nearly all students with Māori and Pacific ethnicity entered via the MAPAS pathway. Furthermore, the MAPAS and ROMPE pathways each contained higher proportions of students from lower socio-economic backgrounds and students who attended schools out of Auckland. These findings underscore the importance of having equity pathways or targets, as it unlikely many of the MAPAS students, and some of the ROMPE students would have been successful in the highly competitive selection process for GENERAL students. Furthermore, to provide workforce benefit, students need to complete the programme. Encouragingly, despite marked differences in background and prior performance there was only a 12-15% difference in the proportion of MAPAS students who graduated in the study period compared to ROMPE or GENERAL admission students respectively. Our hypotheses that markers of socio-economic status, transitioning factors, bridging programme attendance and academic preparation are likely to impact on both short-term and long-term academic outcomes were confirmed, although findings are mixed within and across the entry pathways. When looking within the MAPAS cohort, the odds of a MAPAS student graduating (compared to another MAPAS student) improved with non-bridging programme attendance and most likely reflect cohort differences in admission GPA/GPE. In contrast, our findings suggest that having attended a bridging programme, entering medicine as an undergraduate and higher admission GPA/GPA are the major contributors to reducing the GPA difference observed *between* MAPAS and GENERAL students in the early, non-clinical phase of medical training.

1  
2  
3 This study represents a comprehensive analysis of academic outcomes for equity admission pathways  
4 into medicine within NZ. Similarly, this study explores academic outcomes for one of the largest  
5 cohorts of indigenous medical students available internationally. We acknowledge that this study was  
6 confined to a single medical programme and that the results may not be generalisable to other  
7 programmes or tertiary institutions. In particular, the comprehensive nature of the MAPAS  
8 programme with respect to student admission and retention support may not be reflected in other  
9 tertiary contexts.<sup>28</sup> The use of secondary school decile as a proxy for socio-economic position relies on  
10 an area-level indicator of deprivation and may not directly reflect the socio-economic position of each  
11 individual student or their family.<sup>29</sup> Despite this, other school factors (e.g. student attainment,  
12 aspirations for future study) have been linked to school decile suggesting that individual students will  
13 have been exposed to direct school effects.<sup>29-31</sup> This study did not explore the effect of medical  
14 interview outcomes due to different processes of selection being used across equity and general  
15 admission pathways.<sup>32 33</sup> The study period spans across and before periods of significant change  
16 within the MAPAS and ROMPE pathways with respect to admissions processes (i.e. selection methods  
17 and eligibility).<sup>19 34</sup> Therefore, study findings should be interpreted cautiously as 'historical' markers of  
18 equity programme delivery or performance rather than accurate representations of the equity  
19 processes in operation today.<sup>35</sup>  
20  
21  
22  
23  
24  
25  
26  
27  
28

29 Our findings are consistent with the existing literature base that GPA at the point of admission is the  
30 strongest predictor of academic outcomes within the medical programme.<sup>32 36-38</sup> In a critical appraisal  
31 of studies examining medical school failure, O'Neill and colleagues found that lower entry  
32 qualifications at admission were linked to higher failure rates. However, they note that many studies  
33 did not control for confounding factors, were mostly focused on student attributes, with few studies  
34 examining the role of the institution.<sup>39</sup> The fact that 80% of MAPAS students completed medicine  
35 despite being admitted with an average GPA approximately 2 points lower than other medical  
36 students is encouraging. This suggests that whilst GPA at admission is important, other unmeasured  
37 factors may be contributing to our findings. Student pastoral and financial issues (likely to be  
38 significant for indigenous students given their socioeconomic and demographic profile),<sup>40</sup>  
39 psychological characteristics,<sup>41</sup> student learning styles,<sup>37</sup> and relevant medical curricula or structural  
40 factors<sup>39</sup> may also play a role. As noted by Mathers and Parry, graduate applicants to medicine have  
41 complex needs arising from their personal social, family and economic circumstances that may affect  
42 their academic performance.<sup>42</sup> The UoA's commitment to respond to these student factors (via the  
43 provision of comprehensive admission, pastoral and academic support) may be contributing to our  
44 outcomes observed, particularly for graduate entry and bridging programme students admitted under  
45 MAPAS. The positive effect of bridging programme exposure has also been noted elsewhere<sup>43-47</sup>.  
46 However within the MAPAS cohort, those students who did not require additional academic support  
47 via a bridging programme experienced better academic outcomes. Therefore, our findings reinforce  
48 the need for ongoing bridging programme delivery alongside the elimination of educational inequities  
49  
50  
51  
52  
53  
54  
55  
56  
57  
58  
59  
60

1  
2  
3 for Māori and Pacific students.<sup>34 48-51</sup> The association between secondary school decile rating (a  
4 marker of socio-economic status and school characteristics) and academic outcomes had mixed  
5 results and are unlikely to explain the differences observed by admission pathway. Although school  
6 decile has been linked to first year academic outcomes for Māori,<sup>52</sup> our findings may reflect the fact  
7 that school characteristics have been noted to have less impact on student achievement at the higher  
8 end of the achievement scale i.e. GPA  $\geq$  4.<sup>53</sup> However, the strong association between lower school  
9 decile and reduced odds of graduating for the GENERAL admission students challenges this  
10 conclusion, differs from other research<sup>39</sup> and is of concern.

11  
12  
13  
14  
15  
16 Our study reinforces the existing evidence that equity-targeted admission programmes, inclusive of  
17 variations in academic threshold for entry, can support a widening participation agenda within  
18 medicine.<sup>4</sup> However, tertiary institutions and society at large must accept that ethnic inequities in  
19 educational outcomes and rural workforce development needs should be accounted for within  
20 admission pathways and retention support.<sup>48 54</sup> Providing comprehensive academic and pastoral  
21 assistance to equity-admission and lower socioeconomic students who are operating within complex  
22 and academically demanding contexts remains paramount.<sup>28 55 56</sup> Whilst differences in academic  
23 thresholds for equity groups appears necessary, it is often criticised as being 'politically correct',  
24 providing 'preferential treatment' to one group or individual over another, and has not been  
25 universally welcomed by the public or the profession.<sup>16 57-60</sup> Bacchi notes that the framing of widening  
26 participation as 'preferential treatment' "undermines the legitimacy of the reform and reduces its  
27 impact, limiting the kinds of reforms 'permitted' and alienating those who are targeted. This  
28 undoubtedly serves the interests of those who profit under current social arrangements" (p. 144).<sup>58</sup>  
29 Given this context, it is perhaps not surprising that whilst medical schools strive to increase diversity  
30 and meet the goals of a widening participation agenda, successful implementation is influenced by  
31 contextual factors associated with institutional leadership, resource allocation and external  
32 stakeholder pressure.<sup>61</sup> Razack et al note that whilst the development of social accountability policy  
33 has occurred, medical schools appear to be challenged by the implementation of these policies within  
34 student recruitment and selection processes.<sup>62</sup> This study responds to calls for open and inclusive  
35 discussions in order to advance admissions practice aiming to enhance social justice and widening  
36 participation agendas.<sup>62</sup>

37  
38  
39  
40  
41  
42  
43  
44  
45  
46  
47  
48  
49 Additional research is warranted (e.g. inclusion of secondary school outcomes, non-cognitive testing  
50 and medical interview data beyond 2012). Similarly, exploring the effect of institutional attributes  
51 should also be considered.<sup>37 39</sup> Evidence suggests that tertiary and medical school environments may  
52 have different effects on indigenous and ethnic minority students who have reported that their  
53 ethnicity adversely affects their medical school experience,<sup>63</sup> have described experiences of racism  
54 from peers and clinical educators,<sup>28 64</sup> and are adversely effected by an 'othering' medical curriculum  
55 that either stereotypes indigenous culture and society or fails to reflect indigenous realities  
56  
57  
58  
59  
60

1  
2  
3 altogether.<sup>35 40 65 66</sup> Exploring the impact of these variables on differential academic outcomes for  
4 equity admission pathways may require qualitative methods to complement additional quantitative  
5 analyses. The impact of a widening participation agenda within medicine must also begin to look  
6 beyond the number of students admitted and graduated and extend the analysis to post-graduate  
7 clinical contexts including the effect of a diverse health workforce on patient and community  
8 outcomes.<sup>1</sup> The ultimate aim of equity-targeted admission pathways into medicine is to enhance  
9 healthcare delivery, improve health outcomes and eliminate inequities for underserved communities.  
10 Understanding when and how this can be achieved remains a challenge for many countries  
11 worldwide.  
12  
13  
14  
15

### 16 Acknowledgments

17 The authors would like to thank additional members of the Te Hā Advisory Group for the MBChB  
18 analysis: Dr Teuila Percival; Dr Vili Nosa; Dr Malakai Ofanoa; Kate Snow; Michelle Chung; Vernon  
19 Mogol.  
20  
21  
22

### 23 A declaration of competing interests

24 All authors have completed the ICMJE uniform disclosure form at [www.icmje.org/coi\\_disclosure.pdf](http://www.icmje.org/coi_disclosure.pdf)  
25 and declare: no support from any organisation for the submitted work; no financial relationships with  
26 any organisations that might have an interest in the submitted work in the previous three years; no  
27 other relationships or activities that could appear to have influenced the submitted work.”  
28

### 29 Details of contributors

30 Dr Elana Curtis (Senior Lecturer Medical) is the guarantor of the study. She led the study design,  
31 methodological approach, interpretation of the data analysis and was the primary author for drafting  
32 the manuscript. Erena Wikaire (Research Assistant) contributed to study design and provided  
33 research assistance to obtain and clean data variables. She contributed to drafting and revising the  
34 manuscript and was responsible for producing the data tables. Dr Yannan Jiang (Senior Research  
35 Fellow) contributed to the study design and provided senior statistical expertise for data analysis. She  
36 contributed to drafting and revising the manuscript. Louise McMillan (doctoral candidate) provided  
37 junior statistical expertise and contributed to the study design and revising the manuscript. Robert  
38 Loto (Professional Teaching Fellow) contributed to the study design and provided Pacific research  
39 methodological expertise in the interpretation of the data and revising of the manuscript. Associate  
40 Professor Mark Barrow (Associate Dean Education) contributed to the study design and provided  
41 senior tertiary education expertise in the interpretation of the data, drafting and revising of the  
42 manuscript. Professor Warwick Bagg contributed to the study design and provided senior medical  
43 education expertise in the interpretation of the data, drafting and revising of the manuscript.  
44 Professor Phillippa Poole contributed to the study design and provided senior medical education  
45 expertise in the interpretation of the data, drafting and revising of the manuscript. Associate  
46 Professor Papaarangi Reid (Tumaki, Deputy Dean Māori) provided senior Māori educational,  
47 institutional and Kaupapa Māori expertise and contributed to the study design, drafting and revising  
48 the manuscript. All authors read and approved the final manuscript for submission.  
49

### 50 Ethics approval

51 The study was approved by the UoA Human Participants Ethics Committee (UAHPEC) (Reference  
52 8110). As this study used de-identified secondary administrative data, study participants were not  
53 required to give informed consent.  
54

### 55 Funding for the study

56 Dr Elana Curtis was supported by Te Kete Hauora, Ministry of Health (New Zealand) to conduct this  
57 research via the provision of a Research Fellowship (Contract 414953/337535/00). The Ministry of  
58 Health had no role in any of the study design; in the collection, analysis, and interpretation of data;  
59  
60

and in the decision to submit the article for publication. All researchers were independent of the funder of this study.

All authors, external and internal, had full access to all of the data (including statistical reports and tables) in the study and can take responsibility for the integrity of the data and the accuracy of the data analysis.

#### A transparency declaration

I, Dr Elana Curtis (the manuscript's guarantor) affirm that the manuscript is an honest, accurate, and transparent account of the study being reported; that no important aspects of the study have been omitted; and that any discrepancies from the study as planned (and, if relevant, registered) have been explained.

#### A data sharing statement

Data sharing: no additional data available.

#### References

1. Baxter C, Baxter D, Baxter M. Widening participation in medicine: moving beyond the numbers. *Medical Education* 2014;49(1):7-20.
2. Powis D, Hamilton J, McManus I. Widening access by changing the criteria for selecting medical students. *Teaching and Teacher Education* 2007;23(8):1235-45.
3. Cleland J, Nicholson S, Kelly N, et al. Taking context seriously: explaining widening access policy enactments in UK medical schools. *Medical Education* 2014;49(1):25-35.
4. Garlick PB, Brown G. Widening participation in medicine. *Brit Med J* 2008;336(7653):1111-13.
5. Cooper L, Beach M, Johnson R, et al. Delving below the surface. Understanding how race and ethnicity influence relationships in health care. *Journal of General Internal Medicine* 2006;21(Suppl. 1):21-27.
6. van Ryn M, Fu S. Paved with good intentions: do public health and human service providers contribute to racial/ethnic disparities in health? *American Journal of Public Health* 2003;93(2):248-55.
7. Betancourt J, Green A, Emilio Carrillo J, et al. Cultural Competence And Health Care Disparities: Key Perspectives and Trends. *Health Affairs* 2005;24(2):499-505.
8. Cantor JC, Miles EL, Baker LC, et al. Physician service to the uninsured: implication for affirmative action in medical education. *Inquiry* 1996;33:167-80.
9. Larkins S, Michielsen K, Iputo J, et al. Impact of selection strategies on representation of underserved populations and intention to practise: international findings. *Medical Education* 2015;49(1):60-72.
10. Whitla D, Orfield G, Silen W, et al. Educational Benefits of Diversity in Medical School: a survey of students. *Academic Medicine* 2003;78(5):460-66.
11. Hung R, McClendon J, Henderson A, et al. Student perspectives on diversity and the cultural climate at a U.S. medical school. *Academic Medicine* 2007;82(2):184-92.
12. Elam C, Johnson M, Wiggs J, et al. Elam C, Johnson M, Wiggs J, et al. Diversity in medical school: perceptions of first-year students at four Southeastern U.S. medical schools. *Academic Medicine* 2001;76(1):60-65. *Academic Medicine* 2001;76(1):60-65.
13. van Ryn M, Hardeman R, Phelan S, et al. Medical School Experiences Associated with Change in Implicit Racial Bias Among 3547 Students: A Medical Students CHANGES Study Report. *Journal of General Internal Medicine* 2015 doi: 10.1007/s11606-01503447-7
14. Seyan K, Greenhalgh T, Dorling D. The standardised admission ratio for measuring widening participation in medical schools: analysis of UK medical school admissions by ethnicity, socioeconomic status, and sex. *Brit Med J* 2004;328(15):45-46.
15. Ready T. The Impact of Affirmative Action on Medical Education and the Nation's Health. In: Orfield G, Kurlaender M, eds. *Diversity Challenges Evidence on the Impact of Affirmative Action*. Cambridge: Harvard Educational Review 2001:205-19.



- 1
- 2
- 3 16. Ip H, McManus I. Increasing diversity among clinicians. Is politically correct but is costly
- 4 and lacks evidence to support it. *Brit Med J* 2008;336:1082-83.
- 5 17. Bollinger L. The need for diversity in higher education. *Academic Medicine*
- 6 2003;78(5):431-36.
- 7 18. Young M, Razack S, Hanson M, et al. Calling for a broader conceptualisation of diversity:
- 8 surface and deep diversity in four Canadian Medical Schools. *Academic Medicine*
- 9 2012;87(11):1-10.
- 10 19. Curtis E, Reid P. Indigenous health workforce development: Challenges and successes of
- 11 the Vision 20:20 programme. *Australian & New Zealand Journal of Surgery*
- 12 2013;83:49 - 54.
- 13 20. Mitchell C, Shulruf .B, Poole P. Relationship between decile score of secondary school, the
- 14 size of town of origin and career intentions of New Zealand medical students. *Journal*
- 15 *of Primary Health Care* 2010;2(3):183-89.
- 16 21. Rabinowitz H, Diamond J, Markham F, et al. Critical factors for designing programs to
- 17 increase the supply and retention of rural primary care physicians. *Journal of the*
- 18 *American Medical Association* 2001;286(9):1041-48.
- 19 22. Mitchell C, Shulruf B, Poole P. Relationship between decile score of secondary school, the
- 20 size of town of origin and career intentions of New Zealand medical students. *Journal*
- 21 *of Primary Health Care* 2010;2(3):183-89.
- 22 23. Collins J, White G. Selection of Auckland medical students over 25 years: a time for
- 23 change? *Medical Education* 1993;27(4):321-27.
- 24 24. Smith L. Decolonizing Methodologies: Research and Indigenous Peoples. 2nd ed. London
- 25 & New York: Zed Books 2012.
- 26 25. Vaioleti T. Talanoa Research Methodology: A Developing Position on Pacific Research.
- 27 *Waikato Journal of Education* 2006;12:21-34.
- 28 26. Valencia R. The Evolution of Deficit Thinking: Educational Thought and Practice.
- 29 Washington DC: The Palmer Press 1997.
- 30 27. Mills C, Heyworth J, Rosenwax L, et al. Factors associated with the academic success of
- 31 first year health science students. *Advances in Health Sciences Education*
- 32 2009;14(2):205-17. doi: <http://dx.doi.org/10.1007/s10459-008-9103-9>
- 33 28. Curtis E, Wikaire E, Kool B, et al. What helps and hinders indigenous student success in
- 34 higher education health programmes: A qualitative study using the Critical Incident
- 35 Technique *Higher Education Research & Development* 2014;34(3):486-500. doi:
- 36 10.1080/07294360.2014.973378
- 37 29. Engler R. School leavers' progression to bachelors-level study. Secondary to tertiary
- 38 transitions. Wellington: Ministry of Education, 2010.
- 39 30. Thrupp M, Lupton R. Taking schools more seriously: the social justice challenge. *British*
- 40 *Journal of Educational Studies* 2006;54:308-28.
- 41 31. Leach L, Zepke N. Student decision-making by prospective tertiary students. A review of
- 42 existing New Zealand and overseas literature. Wellington: Ministry of Education,
- 43 2005.
- 44 32. Poole P, Shulruf B, Rudland J, et al. Comparison of UMAT scores and GPA in prediction
- 45 of performance in medical school: A national study. *Medical Education*
- 46 2012;46(2):163-71.
- 47 33. Madjar I, McKinley E, Jenssen S, et al. Towards University: Navigating NCEA Course
- 48 Choices in Low-Mid Decile Schools. Auckland: The University of Auckland, 2009.
- 49 34. Curtis E, Wikaire E, Jiang Y, et al. Quantitative analysis of a Māori and Pacific admission
- 50 process on first-year health study. *BMC Medical Education* 2015;15(196):1-17.
- 51 35. Curtis E, Reid P, Jones R. Decolonising the Academy: The process of re-presenting
- 52 indigenous health in tertiary teaching and learning. In: Cram F, Phillips H, Sauni P, et
- 53 al., eds. Māori and Pasifika Higher Education Horizons. Bingley, U.K.: Emerald Group
- 54 Publishing Limited 2014:147-66.
- 55 36. Wilkinson D, Zhang J, Byrne G, et al. Medical school selection criteria and the prediction
- 56 of academic performance. Evidence leading to change in policy and practice at the
- 57 University of Queensland. *Medical Education* 2008;188:349-54.
- 58 37. Ferguson E, James D, Madeley L. Factors associated with success in medical school:
- 59 systematic review of the literature. *Brit Med J* 2002;324:952-57.
- 60 38. Schulruf B, Poole P, Wang G, et al. How well do selection tools predict performance later
- in a medical programme? *Advances in Health Sciences Education* 2012;17:615-26.

39. O'Neill L, Wallstedt B, Eika B, et al. Factors associate with dropout in medical education: A literature review. *Medical Education* 2011;45:440 - 54.
40. Gorinski R, Abernathy G. Māori student retention and success: Curriculum, pedagogy and relationships. In: Townsend T, Bates R, eds. Handbook of teacher education: Globalization, standards and professionalism in times of change. Dordrecht: Springer 2007:229-40.
41. Fazey D, Fazey J. The potential for autonomy in learning: Perceptions of competence, motivation and locus of control in first-year undergraduate students. *Studies in Higher Education* 2001;26(3):345-61.
42. Mathers J, Parry J. Older mature students' experiences of applying to study medicine in England: an interview study. *Medical Education* 2010;44(11):1084-94.
43. Burch V, Sikakana C, Gunston G, et al. Generic Learning skills in academically-at-risk medical students: A development programme bridges the gap. *Medical Teacher* 2013;35(8):671-77.
44. Curtis E, Wikaire E, Jang Y, et al. Open to critique: predictive effects of academic outcomes from a bridging/foundation programme on first-year degree-level study. *Assessment & Evaluation in Higher Education* 2015:1-17. doi: 10.1080/02602938.2015.1087463
45. Strayhorn G. A pre-admission program for underrepresented minority and disadvantaged students: application, acceptance, graduation rates and timeliness of graduating from medical school. *Academic Medicine* 2000;75(4):355-61.
46. Strayhorn G. Participation in a premedical summer program for underrepresented-minority students as a predictor of academic performance in the first three years of medical school: two studies. *Academic Medicine* 1999;74(4):435-47.
47. Mathers J, Sitch A, Marsh J, et al. Widening access to medical education for under-represented economic groups: population based cross sectional analysis of UK data, 2002-6. *Brit Med J* 2011;342:918.
48. Curtis E, Wikaire E, Stokes K, et al. Addressing indigenous health workforce inequities: A literature review exploring 'best' practice for recruitment into tertiary health programmes. *International Journal for Equity in Health* 2012;11(13):1-15.
49. Ratima M, Brown R, Garrett N, et al. Rauringa Raupa: Recruitment and retention of Māori in the health and disability workforce. Auckland: Taupua Waiora: Division of Public Health and Psychosocial Studies. Faculty of Health and Environmental Sciences: AUT University, 2007.
50. Anderson I. Indigenous Pathways into the Professions. Commissioned Report for the Review of Higher Education Access and Outcomes for Aboriginal and Torres Strait Islander People. Melbourne: University of Melbourne, 2011.
51. Curtis E, Wikaire E, Jang Y, et al. A tertiary approach to improving equity in health: Quantitative analysis of the Māori and Pacific Admission Scheme (MAPAS) process, 2008-2012. *International Journal for Equity in Health* 2015;14(7):1-15. doi: 10.1186/s12939-015-0133-7
52. Earle D. Hei titiro anō i te whāinga. Māori achievement in bachelors degrees revisited. Wellington: Ministry of Education, 2008.
53. Schulruf B, Hattie J, Tumen S. Individual and school factors affecting student's participation and success in higher education. *Higher Education* 2008;56(5):613-32.
54. Poole P, Moriarty H, Wearn A, et al. Medical Student Selection in New Zealand: Looking to the future. *New Zealand Medical Journal* 2009;122(1306):88-100.
55. Spencer A, Young T, Williams S, et al. Survey on Aboriginal issues within Canadian medical programmes. *Medical Education* 2005;39(11):1101-9.
56. Whiteford G, Shah M, Nair C. Equity and excellence are not mutually exclusive: A discussion of academic standards in an era of widening participation. *Quality Assurance in Education* 2013;21(3):299-310.
57. Reiter H, MacCoon K. A compromise method to facilitate under-represented minority admissions into medical school. *Advances in Health Sciences Education* 2007;12(2):223-37.
58. Bacchi C. Policy and discourse: challenging the construction of affirmative action as preferential treatment. *Journal of European Public Policy* 2004;11(1 February):128-46.

- 1  
2  
3 59. Reiter H, Maccoon K. A compromise method to facilitate under-represented minority  
4 admissions into medical school. *Advances in Health Sciences Education*  
5 2007;12:223-37.  
6 60. Mathers J, Sitch A, Marsh J, et al. Widening access to medical education for under-  
7 represented economic groups: population based cross sectional analysis of UK data,  
8 2002-6. *British Medical Journal* 2011;341:1-7.  
9 61. Cleland J, Nicholson S, Kelly N, et al. Taking context seriously: explaining widening  
10 access policy enactments in UK medical schools. *Medical Education* 2014;49:25-35.  
11 62. Rzack S, Maguire M, Hodges B, et al. What might we be saying to potential applicants to  
12 medical school? Discourses of excellence, equity, and diversity on the web sites of  
13 Canada's 17 medical schools. *Academic Medicine* 2012;87(10):1323-29.  
14 63. Dyrbye L, Thomas M, Eacker A, et al. Race, ethnicity, and medical student well-being in  
15 the United States. *Archives of Internal Medicine* 2007;167(19):2103-09.  
16 64. Garvey G, Rolfe I, Pearson S, et al. Indigenous Australian medical students' perceptions  
17 of their medical school training. *Medical Education* 2009;43(11):1047-55.  
18 65. Chauvel F, Rean J. Doing better for Māori in tertiary settings. Wellington: Tertiary  
19 Education Commission, 2012.  
20 66. Mayeda D, Keil M, Dutton H, et al. "You've Gotta Set A Precedent". Māori and Pacific  
21 voices on student success in higher education. *ALTERNATIVE* 2014;10(2):165-79.  
22  
23  
24  
25  
26  
27  
28  
29  
30  
31  
32  
33  
34  
35  
36  
37  
38  
39  
40  
41  
42  
43  
44  
45  
46  
47  
48  
49  
50  
51  
52  
53  
54  
55  
56  
57  
58  
59  
60

Figure 1: Conceptual model and multiple regression analysis plan with stepwise model selection.

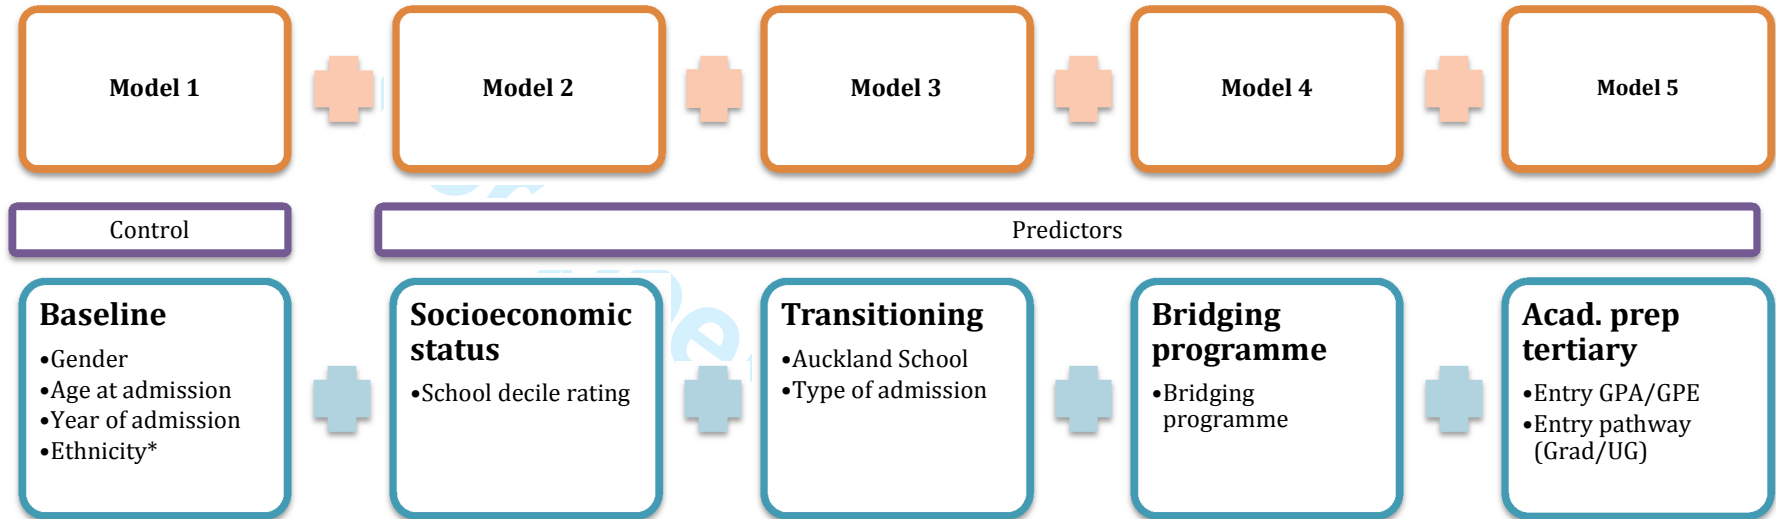

\*Ethnicity included in GENERAL and MAPAS admission category sub-cohort analyses only.

Table 1: Descriptive variables for GENERAL, MAPAS and ROMPE admission categories, 2002 – 2012.

| Descriptive summary variables           | Admission category        |           |                  |           |                |                  |           |                | Total<br>(n=1676) |           |
|-----------------------------------------|---------------------------|-----------|------------------|-----------|----------------|------------------|-----------|----------------|-------------------|-----------|
|                                         | GENERAL (ref)<br>(n=1167) |           | MAPAS<br>(n=317) |           | p-value        | ROMPE<br>(n=192) |           | p-value        |                   |           |
| <i>Categorical variables</i>            | <i>n</i>                  | <i>%</i>  | <i>n</i>         | <i>%</i>  |                |                  | <i>n</i>  |                | <i>%</i>          |           |
| <b>Female</b>                           | 609                       | 52.19     | 178              | 56.15     | 0.2096         | 118              | 61.46     | 0.0170         | 905               | 54        |
| <b>Ethnicity</b>                        |                           |           |                  |           | <.0001         |                  |           | <.0001         |                   |           |
| <i>Māori</i>                            | 21                        | 1.80      | 186              | 58.68     |                | 2                | 1.04      |                | 209               | 12.47     |
| <i>Pacific</i>                          | 14                        | 1.20      | 129              | 40.69     |                | 2                | 1.04      |                | 145               | 8.65      |
| <i>Asian</i>                            | 527                       | 45.16     | 1                | 0.32      |                | 21               | 10.94     |                | 549               | 32.76     |
| <i>Other</i>                            | 59                        | 5.06      | 1                | 0.32      |                | 3                | 1.56      |                | 63                | 3.76      |
| <i>Pākehā/European</i>                  | 532                       | 45.59     | 0                | 0.00      |                | 161              | 83.85     |                | 693               | 41.35     |
| <i>Missing/No response</i>              | 14                        | 1.20      | 0                | 0.00      |                | 4                | 1.56      |                | 17                | 1.20      |
| <b>Year of admission</b>                |                           |           |                  |           | 0.0680         |                  |           | <.0001         |                   |           |
| 2002                                    | 109                       | 87.9      | 15               | 12.1      |                | -                | -         |                | 124               | 7.40      |
| 2003                                    | 94                        | 82.46     | 20               | 17.54     |                | -                | -         |                | 114               | 7.14      |
| 2004                                    | 93                        | 70.99     | 21               | 16.03     |                | 17               | 12.98     |                | 131               | 8.21      |
| 2005                                    | 88                        | 68.75     | 18               | 14.06     |                | 22               | 17.19     |                | 128               | 8.02      |
| 2006                                    | 83                        | 64.84     | 24               | 18.75     |                | 21               | 16.41     |                | 128               | 8.02      |
| 2007                                    | 103                       | 71.03     | 22               | 15.17     |                | 20               | 13.79     |                | 145               | 9.09      |
| 2008                                    | 105                       | 68.18     | 30               | 19.48     |                | 19               | 12.34     |                | 154               | 9.65      |
| 2009                                    | 103                       | 65.19     | 33               | 20.89     |                | 22               | 13.92     |                | 158               | 9.90      |
| 2010                                    | 122                       | 64.89     | 44               | 23.4      |                | 22               | 11.7      |                | 188               | 11.78     |
| 2011                                    | 130                       | 68.78     | 40               | 21.16     |                | 19               | 10.05     |                | 189               | 11.84     |
| 2012                                    | 137                       | 63.13     | 50               | 23.04     |                | 30               | 13.82     |                | 217               | 13.60     |
| <b>School decile rating</b>             |                           |           |                  |           | <.0001         |                  |           | <.0001         |                   |           |
| <i>High</i>                             | 838                       | 71.81     | 134              | 42.27     |                | 82               | 42.71     |                | 1054              | 62.89     |
| <i>Medium</i>                           | 236                       | 20.22     | 108              | 34.07     |                | 82               | 42.71     |                | 426               | 25.42     |
| <i>Low</i>                              | 30                        | 2.57      | 62               | 19.56     |                | 14               | 7.29      |                | 106               | 6.32      |
| <i>Missing</i>                          | 63                        | 5.40      | 13               | 4.10      |                | 14               | 7.29      |                | 90                | 5.37      |
| <b>Attended school in Auckland</b>      | 851                       | 72.92     | 189              | 59.62     | <.0001         | 58               | 30.21     | <.0001         | 1098              | 65.51     |
| <b>Completed bridging programme</b>     | 10                        | 0.86      | 78               | 24.61     | <.0001         | 1                | 0.52      | 1.000          | 89                | 5.31      |
| <b>Admitted as School leaver (yr 1)</b> | 852                       | 73.01     | 157              | 49.53     | <.0001         | 114              | 59.38     | 0.0001         | 1123              | 67.00     |
| <b>Entry pathway</b>                    |                           |           |                  |           | 0.3019         |                  |           | 0.0002         |                   |           |
| <i>Graduate</i>                         | 221                       | 18.94     | 52               | 16.40     |                | 59               | 30.73     |                | 332               | 19.81     |
| <i>Undergraduate</i>                    | 946                       | 81.06     | 265              | 83.60     |                | 133              | 69.27     |                | 1344              | 80.19     |
| <b>Programme outcome</b>                |                           |           |                  |           | <.0001         |                  |           | 0.3109         |                   |           |
| <i>Current students</i>                 | 389                       | 33.33     | 134              | 42.27     |                | 71               | 36.98     |                | 594               | 35.44     |
| <i>Completed students</i>               | 778                       | 66.67     | 183              | 57.73     |                | 121              | 63.02     |                | 1082              | 64.56     |
| Graduated MBCHB                         | 735                       | 94.47     | 146              | 79.78     |                | 111              | 91.74     |                | 992               | 91.68     |
| Did not graduate                        | 43                        | 5.53      | 37               | 20.22     |                | 10               | 8.26      |                | 90                | 8.32      |
| <b>Continuous variables</b>             | <i>Mean</i>               | <i>SD</i> | <i>Mean</i>      | <i>SD</i> | <i>p-value</i> | <i>Mean</i>      | <i>SD</i> | <i>p-value</i> | <i>Mean</i>       | <i>SD</i> |
| <b>Age at admission (yr 2)</b>          | 20.09                     | 3.02      | 21               | 3.88      | <0.0001        | 21.47            | 4.55      | <0.0001        | 20.42             | 3.44      |
| <b>Admission GPA/GPE</b>                | 8.26                      | 0.86      | 6.22             | 1.19      | <0.0001        | 7.74             | 0.87      | <0.0001        | 7.81              | 1.22      |
| <b>Year 2-3 GPA</b>                     | 6.45                      | 1.41      | 4.52             | 1.48      | <0.0001        | 6.01             | 1.5       | 0.0002         | 6.04              | 1.62      |

Cohort 2002-12 comprises students who matriculated into Year 2 of the MBCHB (or Bachelor of Human Biology BHB) programme within FMHS from 2002 to 2012 inclusive, excluding international entry students. Students who repeated Year 2 have been recorded in their first Year 2 year. All variables have been compared for the General vs. MAPAS categories and for the General vs. RRAS categories. Categorical variables have been tested using Chi-squared test, or Fisher's exact test where necessary. Continuous variables have been tested using the ANOVA model, with adjustment for multiple comparisons.

Table 2: Descriptive variables for GENERAL, MAPAS and ROMPE admission categories 2002 – 2009.

| Descriptive summary variables           | Admission category |           |               |           |         |               |           |         |             | Total (n=1082) |          |
|-----------------------------------------|--------------------|-----------|---------------|-----------|---------|---------------|-----------|---------|-------------|----------------|----------|
|                                         | GENERAL (n=778)    |           | MAPAS (n=183) |           | p-value | ROMPE (n=121) |           | p-value | n           | %              |          |
| <i>Categorical variables</i>            | <i>n</i>           | <i>%</i>  | <i>n</i>      | <i>%</i>  |         |               | <i>n</i>  |         |             |                | <i>%</i> |
| <b>Female</b>                           | 427                | 54.88     | 103           | 56.28     | 0.7319  | 76            | 62.81     | 0.1023  | 606         | 56.01          |          |
| <b>Ethnicity</b>                        |                    |           |               |           | <.0001  |               |           | <.0001  |             |                |          |
| <i>Māori</i>                            | 20                 | 2.57      | 102           | 55.74     |         | 2             | 1.65      |         | 124         | 11.46          |          |
| <i>Pacific</i>                          | 14                 | 1.80      | 79            | 43.17     |         | 2             | 1.65      |         | 95          | 8.78           |          |
| <i>Asian</i>                            | 339                | 43.57     | 1             | 0.55      |         | 12            | 9.92      |         | 352         | 32.53          |          |
| <i>Other</i>                            | 44                 | 5.66      | 1             | 0.55      |         | 3             | 2.48      |         | 48          | 4.44           |          |
| <i>Pākehā/European</i>                  | 348                | 44.73     | 0             | 0.00      |         | 99            | 81.82     |         | 447         | 41.31          |          |
| <i>Missing/No response</i>              | 13                 | 1.68      | 0             | 0.00      |         | 3             | 2.48      |         | 16          | 1.48           |          |
| <b>School decile rating</b>             |                    |           |               |           | <.0001  |               |           | <.0001  |             |                |          |
| <i>High</i>                             | 545                | 70.05     | 80            | 43.72     |         | 54            | 44.63     |         | 679         | 62.75          |          |
| <i>Medium</i>                           | 159                | 20.44     | 54            | 29.51     |         | 48            | 39.67     |         | 261         | 24.12          |          |
| <i>Low</i>                              | 24                 | 3.08      | 38            | 20.77     |         | 9             | 7.44      |         | 71          | 6.56           |          |
| <i>Missing</i>                          | 50                 | 6.43      | 11            | 6.01      |         | 10            | 8.26      |         | 71          | 6.56           |          |
| <b>Attended school in Auckland</b>      | 565                | 72.62     | 115           | 62.84     | 0.0017  | 48            | 39.67     | <.0001  | 728         | 67.28          |          |
| <b>Completed bridging programme</b>     | 8                  | 1.03      | 41            | 22.40     | <.0001  | 1             | 0.83      | 1.0000  | 50          | 4.62           |          |
| <b>Admitted as School leaver (yr 1)</b> | 565                | 72.62     | 91            | 49.73     | <.0001  | 78            | 64.46     | 0.0643  | 734         | 67.84          |          |
| <b>Entry pathway</b>                    |                    |           |               |           | 0.5200  |               |           | 0.0001  |             |                |          |
| <i>Graduate</i>                         | 121                | 15.55     | 32            | 17.49     |         | 36            | 29.75     |         | 189         | 17.47          |          |
| <i>Undergraduate (UG)</i>               | 657                | 84.45     | 151           | 82.51     |         | 85            | 70.25     |         | 893         | 82.53          |          |
| <b>Graduated (yes)</b>                  | 735                | 94.47     | 146           | 79.78     | <.0001  | 111           | 91.74     | 0.2343  | 992         | 91.68          |          |
| <i>Continuous variables</i>             | <i>Mean</i>        | <i>SD</i> | <i>Mean</i>   | <i>SD</i> |         | <i>Mean</i>   | <i>SD</i> |         | <i>Mean</i> | <i>SD</i>      |          |
| <b>Age at admission (yr 2)</b>          | 20.02              | 3.10      | 20.98         | 3.97      | 0.0014  | 21.07         | 3.80      | 0.0041  | 20.3        | 3.37           |          |
| <b>Admission GPA/GPE</b>                | 8.12               | 0.99      | 6.04          | 1.29      | <0.0001 | 7.72          | 0.88      | 0.0002  | 7.72        | 1.29           |          |

Cohort 2002-9 comprises students who matriculated into Year 2 of the MBCHB (or Bachelor of Human Biology BHB) programme within FMHS from 2002 to 2009 inclusive, excluding international entry students. Students who repeated Year 2 have been recorded in their first Year 2 year. All variables have been compared for the General vs. MAPAS categories and for the General vs. RRAS categories. Categorical variables have been tested using Chi-squared test, or Fisher's exact test where necessary. Continuous variables have been tested using the ANOVA model, with adjustment for multiple comparisons.

Table 3: Multiple regression results for Graduated (2002-2009 cohort) and Year 2-3 GPA (2002–2012 cohort) academic outcomes.

| Model                         | Predictor variable (ref)     | Comparison   | Graduated (n=1082)<br>(2002 - 2009 cohort) |              |              | Year 2-3 GPA (n=1676)<br>(2002 – 2012 cohort) |                 |                |       |                |
|-------------------------------|------------------------------|--------------|--------------------------------------------|--------------|--------------|-----------------------------------------------|-----------------|----------------|-------|----------------|
|                               |                              |              | Overall p-value                            | OR           | 95% CI       | Overall p-value                               | Mean difference | 95% CI         |       |                |
| Unadj.                        | Admission category (GENERAL) | MAPAS        | <.0001                                     | 0.23         | (0.14, 0.37) | <.0001                                        | -1.93           | (-2.11,-1.76)  |       |                |
|                               |                              | ROMPE        |                                            | 0.65         | (0.32, 1.33) |                                               | -0.45           | (-0.67,-0.23)  |       |                |
| 1                             | Admission category (GENERAL) | MAPAS        | <.0001                                     | 0.24         | (0.14, 0.39) | <.0001                                        | -1.99           | (-2.17,-1.82)  |       |                |
|                               |                              | ROMPE        |                                            | 0.70         | (0.33, 1.50) |                                               | -0.54           | (-0.76,-0.32)  |       |                |
| 2                             | Admission category (GENERAL) | MAPAS        | 0.0001                                     | 0.29         | (0.16, 0.51) | <.0001                                        | -1.94           | (-2.12, -1.75) |       |                |
|                               |                              | ROMPE        |                                            | 0.63         | (0.28, 1.44) |                                               | -0.54           | (-0.77, -0.31) |       |                |
|                               | School decile (High 8-10)    | Medium (4-7) |                                            | 0.0032       | 0.56         |                                               | (0.32, 0.98)    | 0.0279         | -0.16 | (-0.32, -0.00) |
|                               |                              | Low (1-3)    |                                            | 0.29         | (0.14, 0.61) |                                               | -0.32           | (-0.61, -0.03) |       |                |
| 3                             | Admission category (GENERAL) | MAPAS        | 0.0002                                     | 0.30         | (0.17, 0.53) | <.0001                                        | -1.89           | (-2.08, -1.70) |       |                |
|                               |                              | ROMPE        |                                            | 0.48         | (0.21, 1.12) |                                               | -0.53           | (-0.76, -0.31) |       |                |
|                               | School decile (High 8-10)    | Medium (4-7) |                                            | 0.0022       | 0.52         |                                               | (0.29, 0.93)    | 0.0454         | -0.15 | (-0.31, 0.00)  |
|                               |                              | Low (1-3)    |                                            | 0.28         | (0.13, 0.59) |                                               | -0.29           | (-0.58, -0.00) |       |                |
| Auckland school (Yes)         | No                           | 0.0030       | 2.67                                       | (1.40, 5.09) | -            | -                                             | -               |                |       |                |
|                               | Type of admission (SL)       | AA           | 0.0430                                     | 0.53         | (0.29, 0.10) | 0.0004                                        | -0.34           | (-0.53, -0.15) |       |                |
| 4                             | Admission category (GENERAL) | MAPAS        | 0.0182                                     | 0.44         | (0.23, 0.84) | <.0001                                        | -1.72           | (-1.91, -1.53) |       |                |
|                               |                              | ROMPE        |                                            | 0.42         | (0.18, 0.10) |                                               | -0.61           | (-0.83, -0.39) |       |                |
|                               | School decile (High 8-10)    | Medium (4-7) |                                            | 0.0096       | 0.58         |                                               | (0.32, 1.05)    | -              | -     | -              |
|                               |                              | Low (1-3)    |                                            | 0.31         | (0.14, 0.68) |                                               | -               | -              | -     |                |
|                               | Auckland school (Yes)        | No           |                                            | 0.0062       | 2.52         |                                               | (1.30, 4.88)    | -              | -     | -              |
|                               | Type of admission (SL)       | AA           |                                            | -            | -            |                                               | -               | -              | -     | -              |
| Bridging Programme (No)       | Yes                          | <.0001       | 0.16                                       | (0.07, 0.36) | <.0001       | -1.24                                         | (-1.56, -0.91)  |                |       |                |
| 5                             | Admission category (GENERAL) | MAPAS        | 0.1251                                     | 1.68         | (0.74, 3.83) | 0.1306                                        | 0.10            | (-0.10, 0.31)  |       |                |
|                               |                              | ROMPE        |                                            | 0.56         | (0.23, 1.37) |                                               | -0.14           | (-0.33, 0.04)  |       |                |
|                               | School decile (High 8-10)    | Medium (4-7) |                                            | 0.0276       | 0.66         |                                               | (0.35, 1.23)    | -              | -     | -              |
|                               |                              | Low (1-3)    |                                            | 0.31         | (0.13, 0.74) |                                               | -               | -              | -     |                |
|                               | Auckland school (Yes)        | No           |                                            | 0.0030       | 2.88         |                                               | (1.43, 5.79)    | -              | -     | -              |
|                               | Type of admission (SL)       | AA           |                                            | -            | -            |                                               | -               | -              | -     | -              |
| Bridging Programme (No)       | Yes                          | <.0001       | 0.17                                       | (0.07, 0.40) | <.0001       | -0.90                                         | (-1.18, -0.61)  |                |       |                |
| Entry pathway (Undergraduate) | Graduate                     | 0.0100       | 0.45                                       | (0.24, 0.82) | <.0001       | 0.47                                          | (0.31, 0.64)    |                |       |                |
| Admission GPA/GPE             | per point increase           | <.0001       | 1.95                                       | (1.55, 2.45) | <.0001       | 0.89                                          | (0.82, 0.95)    |                |       |                |

\* n is the total number in the cohort, number used is the number of students who have complete data for the given model (all other students are excluded from the analysis). In the Total Cohort, 90 did not graduate whereas 992 graduated. Model #2 – 5 cohort sizes reduced to 1011 and 1586 respectively due to missing school decile data; fewer students were excluded due to missing data for the remaining predictors. Logistic regression model applied to graduation outcome, linear regression model applied to Year2-3 GPA outcome. All regression models have controlled for year of admission, gender and age at admission. Pre-defined predictors were added to the baseline model in sequential order to estimate their joint independent effects on the outcome. All models include the predictor Admission Category. Each model was initially run with all the specified predictors, then re-run with stepwise selection to include significant predictors only and obtain final estimates of effect size. Model-adjusted estimates of odds ratios (compared to the reference level), 95% confidence intervals (CI) and associated individual p-values (in symbols) were reported.

Table 4:

## (a) Logistic regression results for Graduated (2002-2009 cohort) academic outcome for MAPAS and GENERAL subgroups.

| Model | Predictor variable (ref)                                                                 | Comparison         | Graduated (2002 - 2009 cohort)<br>MAPAS (n=181) |       |                | Graduated (2002 - 2009 cohort)<br>GENERAL (n=778) |       |               |
|-------|------------------------------------------------------------------------------------------|--------------------|-------------------------------------------------|-------|----------------|---------------------------------------------------|-------|---------------|
|       |                                                                                          |                    | Overall p-value                                 | OR    | 95% CI         | Overall p-value                                   | OR    | 95% CI        |
| 1     | <b>Ethnicity</b><br>(reference group Māori for<br>MAPAS, Pākehā/European for<br>GENERAL) | Māori              | -                                               | -     | -              | 0.0010                                            | 0.175 | (0.047,0.648) |
|       |                                                                                          | Pacific            | 0.0035                                          | 0.285 | (0.123,0.662)  | -                                                 | 0.089 | (0.023,0.339) |
|       |                                                                                          | Asian              | -                                               | -     | -              | -                                                 | 0.657 | (0.286,1.508) |
|       |                                                                                          | Other/Missing      | -                                               | -     | -              | -                                                 | 0.316 | (0.106,0.940) |
| 5     | <b>School decile (High 8-10)</b>                                                         | Medium (4-7)       | -                                               | -     | -              | 0.0098                                            | 0.384 | (0.164,0.898) |
|       |                                                                                          | Low (1-3)          | -                                               | -     | -              |                                                   |       |               |
|       | <b>Auckland school (Yes)</b>                                                             | No                 | 0.0127                                          | 4.571 | (1.256,16.629) | -                                                 | -     | -             |
|       |                                                                                          | AA                 | -                                               | -     | -              | -                                                 | -     | -             |
|       | <b>Bridging Programme (No)</b>                                                           | Yes                | 0.0014                                          | 0.141 | (0.042,0.468)  | -                                                 | -     | -             |
|       | <b>Entry pathway (Undergraduate)</b>                                                     | Graduate           | 0.0123                                          | 0.170 | (0.043,0.681)  | -                                                 | -     | -             |
|       | <b>Admission GPA/GPE</b>                                                                 | per point increase | 0.0319                                          | 1.758 | (1.050,2.994)  | <.0001                                            | 2.020 | (1.460,2.796) |

Logistic regression model has controlled for year of admission, gender and age at admission. Pre-defined predictors were added to the baseline model in sequential order to estimate their joint independent effects on the outcome. Each model was initially run with all the specified predictors, then re-run with stepwise selection to include significant predictors only and obtain final estimates of effect size. Model-adjusted estimates of odds ratios (compared to the reference level), 95% confidence intervals (CI) and associated individual p-values (in symbols) were reported.

## (b) Linear regression results for Year 2-3 GPA (2002–2012 cohort) academic outcome for MAPAS and GENERAL subgroups.

| Model | Predictor variable (ref)                                                                 | Comparison         | Year 2-3 GPA (2002 – 2012 cohort)<br>MAPAS (n=315) |                 |                 | Year 2-3 GPA (2002 – 2012 cohort)<br>GENERAL (n=1167) |                 |                 |
|-------|------------------------------------------------------------------------------------------|--------------------|----------------------------------------------------|-----------------|-----------------|-------------------------------------------------------|-----------------|-----------------|
|       |                                                                                          |                    | Overall p-value                                    | Mean difference | 95% CI          | Overall p-value                                       | Mean difference | 95% CI          |
| 1     | <b>Ethnicity</b><br>(reference group Māori for<br>MAPAS, Pākehā/European for<br>GENERAL) | Māori              | -                                                  | -               | -               | <.0001                                                | -0.616          | (-1.201,-0.031) |
|       |                                                                                          | Pacific            | 0.0109                                             | -0.425          | (-1.018,0.168)  | -                                                     | -2.226          | (-2.939,-1.513) |
|       |                                                                                          | Asian              | -                                                  | -               | -               | -                                                     | -0.191          | (-0.358,-0.025) |
|       |                                                                                          | Other/Missing      | -                                                  | -               | -               | -                                                     | -0.524          | (-0.852,-0.196) |
| 5     | <b>School decile (High 8-10)</b>                                                         | Medium (4-7)       | -                                                  | -               | -               | -                                                     | -               | -               |
|       |                                                                                          | Low (1-3)          | -                                                  | -               | -               |                                                       |                 |                 |
|       | <b>Auckland school (Yes)</b>                                                             | No                 | -                                                  | -               | -               | -                                                     | -               | -               |
|       |                                                                                          | AA                 | -                                                  | -               | -               |                                                       |                 |                 |
|       | <b>Bridging Programme (No)</b>                                                           | Yes                | <.0001                                             | -0.927          | (-1.209,-0.654) | 0.0036                                                | -1.083          | (-1.812,-0.355) |
|       | <b>Entry pathway (Undergraduate)</b>                                                     | Graduate           | -                                                  | -               | -               | <.0001                                                | 0.577           | (0.377,0.777)   |
|       | <b>Admission GPA/GPE</b>                                                                 | per point increase | <.0001                                             | 0.754           | (0.647,0.861)   | <.0001                                                | 0.977           | (0.891,1.063)   |

Linear regression model has controlled for year of admission, gender and age at admission. Pre-defined predictors were added to the baseline model in sequential order to estimate their joint independent effects on the outcome. Each model was initially run with all the specified predictors, then re-run with stepwise selection to include significant predictors only and obtain final estimates of effect size. Model-adjusted estimates of odds ratios (compared to the reference level), 95% confidence intervals (CI) and associated individual p-values (in symbols) were reported.



# BMJ Open

**Examining the predictors of academic outcomes for indigenous Māori, Pacific and rural students admitted into medicine via two equity pathways: a retrospective observational study at the University of Auckland, Aotearoa New Zealand.**

|                                 |                                                                                                                                                                                                                                                                                                                                                                                                                                                                                                                                                                                                                                                                   |
|---------------------------------|-------------------------------------------------------------------------------------------------------------------------------------------------------------------------------------------------------------------------------------------------------------------------------------------------------------------------------------------------------------------------------------------------------------------------------------------------------------------------------------------------------------------------------------------------------------------------------------------------------------------------------------------------------------------|
| Journal:                        | <i>BMJ Open</i>                                                                                                                                                                                                                                                                                                                                                                                                                                                                                                                                                                                                                                                   |
| Manuscript ID                   | bmjopen-2017-017276.R1                                                                                                                                                                                                                                                                                                                                                                                                                                                                                                                                                                                                                                            |
| Article Type:                   | Research                                                                                                                                                                                                                                                                                                                                                                                                                                                                                                                                                                                                                                                          |
| Date Submitted by the Author:   | 30-May-2017                                                                                                                                                                                                                                                                                                                                                                                                                                                                                                                                                                                                                                                       |
| Complete List of Authors:       | Curtis, Elana; University of Auckland, Te Kupenga Hauora Māori<br>Wikaire, Erena; University of Auckland, Te Kupenga Hauora Māori<br>Jiang, Yannan; The University of Auckland, Department of Statistics<br>McMillan, Louise; The University of Auckland, Department of Statistics<br>Loto, Robert; University of Auckland, Te Kupenga Hauora Māori<br>Poole, Phillippa; University of Auckland, Department of Medicine<br>Barrow, Mark; The University of Auckland, Deanery, Faculty of Medical and Health Sciences<br>Bagg, Warwick; University of Auckland, Medical Programme Directorate<br>Reid, Papaarangi; University of Auckland, Te Kupenga Hauora Māori |
| <b>Primary Subject Heading</b>: | Public health                                                                                                                                                                                                                                                                                                                                                                                                                                                                                                                                                                                                                                                     |
| Secondary Subject Heading:      | Medical education and training                                                                                                                                                                                                                                                                                                                                                                                                                                                                                                                                                                                                                                    |
| Keywords:                       | academic outcomes, equity admission, medicine, indigenous, rural                                                                                                                                                                                                                                                                                                                                                                                                                                                                                                                                                                                                  |
|                                 |                                                                                                                                                                                                                                                                                                                                                                                                                                                                                                                                                                                                                                                                   |

SCHOLARONE™  
Manuscripts

1  
2  
3 **Examining the predictors of academic outcomes for indigenous Māori,**  
4 **Pacific and rural students admitted into medicine via two equity**  
5 **pathways: a retrospective observational study at the University of**  
6 **Auckland, Aotearoa New Zealand.**  
7

8 Elana Curtis<sup>1§</sup>, Erena Wikaire<sup>1</sup>, Yannan Jiang<sup>2</sup>, Louise McMillan<sup>2</sup>, Robert Loto<sup>1</sup>, Phillippa  
9 Poole<sup>3</sup>, Mark Barrow<sup>4</sup>, Warwick Bagg<sup>5</sup>, Papaarangi Reid<sup>1</sup>  
10

11  
12 <sup>1</sup>Te Kupenga Hauora Māori, Faculty of Medical and Health Sciences, University of Auckland,  
13 Private Bag 92015, Auckland, New Zealand

14 <sup>2</sup> Department of Statistics, Faculty of Science, University of Auckland, Private Bag 92015,  
15 Auckland, New Zealand

16 <sup>3</sup>Department of Medicine, Faculty of Medical and Health Sciences, University of Auckland,  
17 Private Bag 92015, Auckland, New Zealand

18 <sup>4</sup> Deanery, Faculty of Medical and Health Sciences, University of Auckland, Private Bag  
19 92015, Auckland, New Zealand

20 <sup>5</sup> Medical Programme Directorate, Faculty of Medical and Health Sciences, University of  
21 Auckland, Private Bag 92015, Auckland, New Zealand

22 <sup>§</sup>Corresponding author. Email addresses: e.curtis@auckland.ac.nz  
23  
24  
25  
26  
27  
28  
29  
30  
31  
32  
33  
34  
35  
36  
37  
38  
39  
40  
41  
42  
43  
44  
45  
46  
47  
48  
49  
50  
51  
52  
53  
54  
55  
56  
57  
58  
59  
60

## Abstract

**Objective** To determine associations between admission markers of socio-economic status, transitioning, bridging programme attendance and prior academic preparation on academic outcomes for indigenous Māori, Pacific and rural students admitted into medicine under access pathways designed to widen participation. Findings were compared to students admitted via the general (usual) admission pathway.

**Design** Retrospective observational study using secondary data.

**Setting** 6-year medical programme (MBChB), University of Auckland, Aotearoa New Zealand. Students are selected and admitted into Year 2 following a first year (undergraduate) or prior degree (graduate).

**Participants** 1,676 domestic students admitted into Year 2 between 2002-2012 via three pathways: GENERAL admission (1,167), Māori and Pacific Admission Scheme – MAPAS (317) or Rural Origin Medical Preferential Entry – ROMPE (192). Of these, 1,082 students completed the programme in the study period.

**Main outcome measures** Graduated from medical programme (yes/no), academic scores in Years 2-3 (Grade Point Average, scored 0-9).

**Results** 735/778 (95%) of GENERAL, 111/121 (92%) of ROMPE and 146/183 (80%) of MAPAS students graduated from intended programme. The graduation rate was significantly lower in the MAPAS students ( $p < 0.0001$ ). The average Year 2-3 GPA was 6.35 (SD 1.52) for GENERAL, which was higher than 5.82 (SD 1.65,  $p = 0.0013$ ) for ROMPE and 4.33 (SD 1.56,  $p < 0.0001$ ) for MAPAS. Multiple regression analyses identified three key predictors of better academic outcomes: bridging programme attendance, admission as an undergraduate and admission GPA/GPE. Attending local urban schools and higher school deciles were also associated with a greater likelihood of graduation. All regression models have controlled for pre-defined baseline confounders (gender, age and year of admission).

**Conclusions** There were varied associations between admission variables and academic outcomes across the three admission pathways. Equity-targeted admission programmes inclusive of variations in academic threshold for entry may support a widening participation agenda, however, additional academic and pastoral supports are recommended.

## Article Summary

### Strengths and limitations of this study

- Most comprehensive quantitative analysis of academic outcomes for equity admission pathways into medicine within NZ.
- Examines one of the largest cohorts of indigenous medical students available internationally.
- Confined to a single medical programme and results may not be generalisable to other programmes or tertiary institutions.
- The use of secondary school decile as a proxy for socio-economic position relies on an area-level indicator of deprivation and may not directly reflect the socio-economic position of each individual student or their family.
- This study did not explore the effect of medical interview outcomes due to different processes of selection being used across equity and general admission pathways.

## Introduction

Widening participation in the medical profession remains a priority for many countries worldwide.<sup>1,2</sup> Most medical schools acknowledge the need to embrace a widening participation agenda in order to contribute to the development of a health workforce that reflects a community's ethnic, cultural, geographic and socio-economic diversity.<sup>3,4</sup> Health workforce diversity is expected to reduce inequities in health outcomes through enhanced patient-provider interactions,<sup>5,6</sup> increased provision of culturally competent care<sup>7</sup> and better delivery to high-need, underserved population groups.<sup>8,9</sup> In addition to workforce and healthcare delivery benefits, increasing diversity within medical school classes has been associated with positive effects on the medical school context itself including enhanced educational experiences for all students,<sup>10,11</sup> positive student attitudes towards the value of diversity within medicine,<sup>12</sup> and the creation of learning contexts that challenge stereotypes and reduce implicit bias of medical students towards under-represented minorities.<sup>13</sup> Widening participation interventions have been successful at increasing medical school diversity for under-represented ethnic minorities, women and rural students; however, disparities by socioeconomic status remain, as reported in the United Kingdom (UK).<sup>14</sup> Despite the strong rationale and increasing evidence of effectiveness,<sup>4,15</sup> interventions to widen participation, such as medical school quotas, regularly come under attack and are criticised for lowering academic and quality standards.<sup>16,17</sup> Comprehensive data analyses that not only measure outcome differences by admission pathways, but also attempt to examine the likely predictors for any observed differences, are needed.<sup>18</sup> This information is expected to better inform the widening participation debate and assist institutions to provide appropriate recruitment and tertiary support interventions for students admitted under equity-targeted admission pathways.

This study explores the predictors of both short- and long-term academic outcomes for (a) indigenous Māori or Pacific students and (b) rural background students admitted into the medical programme (MBChB) under equity admission pathways, compared to general admission at the Faculty of Medical and Health Sciences (FMHS), University of Auckland (UoA), Aotearoa New Zealand (NZ). This is one of two medical schools in NZ, based in a city of over 1.2 million, about a third of the nation's population. Entry into the MBChB at UoA may occur in two ways as: (1) an undergraduate within the first year of a health sciences or biomedical sciences degree at the UoA or (2) as a graduate with a completed undergraduate or postgraduate qualification. Both pathways equate to 'Year 1' of the MBChB degree at the UoA. The Māori and Pacific Admission Scheme (MAPAS) commenced in 1972 in response to Māori and Pacific health workforce shortages, significant inequities in health outcomes and the indigenous rights of Māori within NZ.<sup>19</sup> MAPAS involves comprehensive recruitment and retention interventions delivered within culturally appropriate contexts of support with approximately 240 MAPAS medical students enrolled in 2017 (approximately 20% of the total cohort).<sup>19,20</sup> The Rural Origin Medical Preferential Entry (ROMPE) pathway began in 2004, in response to NZ government prioritisation of rural healthcare needs and evidence that students from rural backgrounds are more

1  
2  
3 likely to return to practice in rural regions.<sup>21</sup> ROMPE initially offered 20 places to students of rural  
4 origin per year. <sup>22</sup> The number of places available on each pathway has increased with increasing  
5 student class sizes and NZ population proportions. Students may apply for only one pathway. The  
6 selection tools used to rank GENERAL and ROMPE students for entry include a measure of prior  
7 academic performance (60%), medical entry interview (25%) and score on the Undergraduate  
8 Medical and Health Sciences Admission Medical Test (UMAT), an aptitude test (15%). MAPAS  
9 selection during the study period consisted of a measure of prior academic performance and an  
10 assessment via a MAPAS-specific interview. <sup>19</sup>

11  
12  
13  
14  
15  
16 Over the first 20 years of MAPAS (i.e. 1972-1992), there was a higher withdrawal rate for MAPAS  
17 medical students compared to other students admitted; however, the reasons for these findings are  
18 unclear and no associations between likely predictor variables and academic outcomes have been  
19 investigated to date. <sup>23</sup> We hypothesise that markers of socio-economic status, transition factors,  
20 bridging programme attendance (implemented specifically for Māori and Pacific students aspiring to  
21 enter medicine from 1999) and prior academic preparation, are likely to impact on both short-term  
22 i.e. year 2-3 Grade Point Average (GPA) and long-term i.e. graduation outcomes. This study aimed to  
23 examine the association between admission variables and academic outcomes for students admitted  
24 into the medical programme under equity admission pathways in comparison to those students  
25 admitted under the general (usual) admission pathway.

## 31 32 **Methods**

### 33 *Study Design*

34  
35 A retrospective observational study design was used to analyse data from all domestic students  
36 entering Year 2 MBChB at the UoA between 2002 and 2012 (with graduation data inclusive of  
37 academic outcomes from 2013). International students were excluded from analysis. Individual  
38 student demographic, admission and academic results data were sourced from Student Services  
39 Online (SSO), the UoA's web-based centralised student data management system, and the Medical  
40 Programme Directorate (MPD) within the FMHS. The study period reflects the availability of  
41 electronic data from these sources and the time required for students to have graduated from a 6-  
42 year medical programme at the time this study commenced. A Kaupapa Māori Research (KMR)  
43 framework, supplemented by Pacific research methodology, was used throughout all aspects  
44 including study design, data collection, data analysis and research dissemination.<sup>24 25</sup> This approach  
45 includes: a commitment to ensuring that the research outputs will have positive benefits for Māori  
46 and Pacific participants and communities; an explicit challenge to reject 'victim blame' and 'cultural  
47 deficit' analyses when interpreting data; <sup>26</sup> and ensuring that any recommendations made from the  
48 research aim to facilitate participant academic success. This broad approach is expected to provide  
49 benefit for all study participants. The study was approved by the UoA Human Participants Ethics  
50 Committee (UAHPEC) (Reference 8110).

### *Predictor Variables*

Participants were identified by their admission category (MAPAS, ROMPE, GENERAL). The decile rating of secondary school attended was used as a proxy measure of socioeconomic status: low (1 – 3) (high deprivation), medium (4 – 7), and high (8 – 10) (low deprivation).<sup>27 28</sup> High decile schools have a high proportion of students who reside in areas of low deprivation (high socioeconomic status). Attended school in Auckland (yes, no) and admitted into Year 1 as a school leaver (yes, no) were used to measure transitioning effects i.e. impact of relocation to Auckland City (the largest city in NZ with a population of 1.4 million where the UoA medical programme is based) and impact of beginning tertiary study as a mature student or school leaver entrant. School leaver (SL) is defined as enrolment in bachelor level study in the year immediately following secondary school. Completion of a UoA bridging foundation programme (yes, no) that aims to bridge the ‘gaps’ between secondary and tertiary education contexts was recorded. The entry pathway into Year 2 MBChB was recorded as graduate or undergraduate. Academic preparation for medical entry was measured by the GPA or Grade Point Equivalent (GPE) at the time of admission for undergraduate and graduate applicants respectively (0-9 representing Fail to A+ average grade).

### *Outcome variables*

Two outcome variables were included in this study: Graduated from MBChB (yes, no) and MBChB Year 2-3 GPA (0-9). Graduated from MBChB represents a long-term academic outcome and was only applied to those students who completed the MBChB programme by 2013 i.e. students admitted between 2002-2009. The Year 2-3 GPA represents a short-term academic outcome associated with the two pre-clinical years of the MBChB programme. Data for this measure were available for a larger cohort of current and graduated students i.e. students admitted between 2002 and 2012. The Year 2-3 GPA represents the average GPA achieved across Years 2 and 3 for students admitted between 2002 and 2011 and the GPA achieved across year 2 only for students admitted in 2012.

### *Analysis*

Statistical analysis was performed using SAS version 9.4 (SAS Institute Inc., Cary, NC, USA). All statistical tests were two-sided at a 5% significance level. A full statistical analysis plan was developed a priori that incorporated baseline confounders, key predictor and outcome variables of interest, based on concepts identified from relevant health workforce development and tertiary education literature as well as experience within the FMHS context as to the factors likely to impact on student success (Figure 1). Multiple regression analyses with stepwise model selection were used to test the associations between predictor variables and academic outcomes for the total cohort (i.e. MAPAS, ROMPE and GENERAL admission combined) and via entry admission sub-cohorts (i.e. MAPAS and GENERAL). The results on ROMPE were not included due to small number of students in the study cohort.

1  
2  
3  
4 [Insert Figure 1]  
5  
6

7  
8 The baseline model has controlled for pre-defined confounders including gender, age, and year of  
9 admission into Year 2 MBChB (Model 1) with the addition of predictor variables representing the  
10 sequential effect of socioeconomic status (Model 2), transitioning (Model 3), bridging programme  
11 (Model 4) and academic preparation (Model 5) on academic outcomes. Each model was initially run  
12 with all the pre-specified predictors of interest, and those predictors that were significant at the 5%  
13 level were retained in the final model. This analysis was applied to all students admitted under  
14 MAPAS, ROMPE and GENERAL categories, with the outcome variables assessed at the time of data  
15 collection. For MBChB Year 2-3 GPA, the mean difference was reported with 95% confidence interval  
16 (CI) using the linear regression model. For Graduation outcome (yes/no), the odds ratio (OR) was  
17 reported with 95% CI using logistic regression model. Similar regression analyses were conducted on  
18 the two largest sub-cohorts for MAPAS and GENERAL categories separately, in order to identify  
19 significant predictors of academic outcomes specific to that sub-cohort. Ethnicity was added to the  
20 baseline model in the sub cohort analyses for MAPAS (Māori, Pacific) and GENERAL (Māori, Pacific,  
21 Asian, European/Pākehā, Other/Missing). Missing data were reported in the descriptive summary, but  
22 excluded in final regression analysis  
23  
24  
25  
26  
27  
28  
29

### 30 31 **Results**

32 A total of 1,676 students were included in the study, representing 1,167 (70%) GENERAL, 317 (19%)  
33 MAPAS and 192 (11%) ROMPE admission categories. Cohort demographics are presented in Table 1.  
34  
35

36  
37 [Insert Table 1]  
38  
39

40 The MAPAS category differs in comparison to the GENERAL category by ethnicity (59% Māori, 41%  
41 Pacific, 0.3% Asian, 0.3% Other,  $p < 0.0001$ ), school decile (42% high, 34% medium and 20% low,  
42  $p < 0.0001$ ), having attended an Auckland school (60%,  $p < 0.0001$ ) and being admitted into medicine as a  
43 school leaver (50%,  $p < 0.0001$ ). The average admission GPA/GPE was approximately 2 points lower for  
44 MAPAS compared to GENERAL admission category students (6.22, SD 1.19,  $p < 0.0001$ ). The ROMPE  
45 category differs in comparison to the GENERAL category by mean age (21.5, SD 4.55,  $p < 0.0001$ ),  
46 gender (61.5% female,  $p < 0.017$ ), ethnicity (84% European/Pākehā, 11% Asian, 1% Māori, 1% Pacific,  
47 2% Other,  $p < 0.0001$ ), school decile (43% high, 43% medium, 7% low,  $p < 0.0001$ ), having attended an  
48 Auckland school (30%,  $p$ -value  $< 0.0001$ ), admission into first year as a school leaver (59%,  $p < 0.0001$ )  
49 and entry pathway into medicine (31% graduate, 69% undergraduate,  $p$ -value  $< 0.0002$ ). The average  
50 admission GPA/GPE was approximately half a point lower for ROMPE compared to GENERAL students  
51 (7.74, SD 1.19,  $p < 0.0001$ ).  
52  
53  
54  
55  
56  
57  
58  
59  
60



1  
2  
3 Of the 1,082 students who completed the programme in the study period (i.e. admitted between  
4 2002-2009), 95% (735/778) of GENERAL, 92% (111/121) of ROMPE and 80% (146/183) of MAPAS  
5 students graduated from MBChB. For the total cohort (admitted between 2002-2012), the mean Year  
6 2-3 GPA was 6.35 (SD 1.52) for GENERAL, 5.82 (SD 1.65,  $p=0.0013$ ) for ROMPE and 4.33 (SD 1.56,  
7  $p<0.0001$ ) for MAPAS students. Table 2 presents the multiple regression analysis findings for the  
8 Total Cohort.  
9  
10

11  
12  
13 [Insert Table 2]  
14  
15

#### 16 *Graduated from Medicine*

17 In the unadjusted model, MAPAS students had significantly lower odds of graduating from intended  
18 programme compared to GENERAL students (OR:0.231, 95% CI:0.144-0.371). This pattern remained  
19 after controlling for age, gender and year of admission i.e. Model 1 (OR:0.235, CI:0.143-0.386). The  
20 odds of MAPAS students graduating in comparison to GENERAL students improved with the addition  
21 of medium and low school decile i.e. Model 2 (OR:0.291, CI:0.165-0.513), and having attended a  
22 school out of Auckland or being admitted into first year as a school leaver i.e. Model 3 (OR:0.296,  
23 CI:0.166-0.526,  $p=0.0002$ ). The addition of having attended a bridging programme increased the odds  
24 of MAPAS students graduating from medicine by a further 14% in comparison to GENERAL students  
25 i.e. Model 5 (OR:0.440, CI:0.231-0.841). When entry pathway into medicine as a graduate and  
26 admission GPA/GPE were added to the analysis i.e. Model 5, the difference in odds of graduating  
27 between admission categories became non-significant (OR:1.680, CI: 0.736-3.833). These findings  
28 suggest that attending a higher decile school, a school outside of Auckland and admission into first  
29 year as a mature student each make a small contribution to the observed difference in graduation  
30 between MAPAS and GENERAL students. However, having attended a bridging/foundation  
31 programme prior to medical school entry had a stronger association with improved graduation  
32 outcome. In addition, both graduate entry admission and admission GPA/GPE are important  
33 contributors, after controlling for which the observed difference between the MAPAS and GENERAL  
34 students was no longer statistically significant.  
35  
36  
37  
38  
39  
40  
41  
42  
43  
44

45 No statistically significant difference was observed in graduation outcome between the ROMPE and  
46 GENERAL students when all predictor variables were taken into account i.e. Model 5 (OR:0.558,  
47 CI:0.227-1.374).  
48  
49

#### 50 *Year 2-3 GPA*

51 In the unadjusted model, the average Year 2-3 GPA was nearly 2 points lower for MAPAS compared to  
52 GENERAL students (-1.934, CI:-2.112 to -1.756). This pattern remained after controlling for age,  
53 gender and year of admission i.e. Model 1 (-1.994, CI:-2.169 to -1.819) and school decile i.e. Model 2  
54 (-1.936, CI:-2.122 to -1.75). Having attended an Auckland school and being admitted into first year as  
55  
56  
57  
58  
59  
60

1  
2  
3 a mature student reduced the difference in GPA slightly i.e. Model 3 (-1.899, CI:-2.076 to -1.702).  
4 Having attended a bridging programme prior to medical study further reduced the difference in GPA  
5 between MAPAS and GENERAL students i.e. Model 4 (-1.724, CI: -1.914 to -1.533). When both  
6 graduate entry admission and admission GPA/GPE were added in Model 5, no significant difference in  
7 Year 2-3 GPA was observed between the admission categories (0.103, CI:-0.103 to 0.309). These  
8 findings suggest that having attended a bridging programme, entering medicine as a graduate and a  
9 higher admission GPA/GPE are associated with improved performance for MAPAS compared to  
10 GENERAL students in the early years of the medical programme.  
11  
12

13  
14  
15  
16 In the unadjusted model, the average difference between Year 2-3 GPA was approximately half a  
17 point lower for ROMPE compared to GENERAL students (-0.449, CI:-0.668 to -0.23). This general  
18 pattern remains for Models 1-4. When all predictor variables were taken into account in Model 5, the  
19 mean difference in Year 2-3 GPA became non-significant (-0.142, CI: -0.326 to 0.043). These findings  
20 suggest that admission as a graduate and admission GPA/GPE are the major contributors to the GPA  
21 difference between ROMPE and GENERAL students.  
22  
23  
24

25  
26 Table 3 presents the multiple regression analysis findings for the sub-cohort analyses for the MAPAS  
27 and GENERAL cohorts.  
28  
29

30  
31 [Insert Table 3]  
32  
33

#### 34 *MAPAS Sub-Cohort*

35 After controlling for pre-defined confounders (e.g. gender, age, ethnicity, year of admission) and all  
36 significant predictors, i.e. Model 5, the odds of a MAPAS student graduating from medicine was 86%  
37 lower for those MAPAS students who attended a bridging programme versus those who did not (OR:  
38 0.141, CI: 0.042-0.468, p=0.0014) and 83% lower for MAPAS students who entered medicine via the  
39 graduate pathway versus the undergraduate pathway (OR: 0.170, CI: 0.043-0.681, p=0.0123). The  
40 odds of graduating increased by 1.8 times for every point increase in admission GPA/GPE (OR:1.758,  
41 CI:1.05-2.944, p=0.0319). There were mixed findings for school decile across the models and this  
42 variable was not significant in the final model that included admission GPA/GPE and entry pathway.  
43  
44  
45  
46  
47

48  
49 For MAPAS students, the year 2-3 GPA was similar for students regardless of whether or not they had  
50 attended a bridging programme (-0.927, CI:-1.209 to 0.645, p<0.0001) and was 25% higher for every  
51 point increase in admission GPA/GPA (0.754, CI: 0.647-0.861, p<0.0001). School decile rating was not  
52 a significant predictor in the final model for the MAPAS cohort.  
53  
54  
55  
56  
57  
58  
59  
60

### GENERAL Sub-Cohort

After controlling for pre-defined confounders (e.g. gender, age, ethnicity, year of admission) and all significant predictors, the odds of a GENERAL student graduating from medicine was lower for students who attended a low decile (OR: 0.137, CI: 0.031-0.6,  $p=0.0098$ ) or medium decile school (OR: 0.384, CI: 0.164-0.898,  $p=0.0098$ ) compared to high school decile. Increasing admission GPA/GPE was strongly associated with increased odds of graduating (OR: 2.020, CI:1.46-2.796,  $p<0.0001$ ). The Year 2-3 GPA was lower for graduate entry GENERAL students compared to undergraduate entry (0.577, CI: 0.377-0.777,  $p=0.0036$ ) with similar outcomes observed for bridging programme attendance (-1.083, CI:-1.182 to -0.355,  $p=0.0036$ ) and admission GPA/GPE (0.977, CI: 0.891-1.063,  $p<0.0001$ ). School decile rating was not a significant predictor of early academic outcomes for the GENERAL cohort.

### Discussion

This study, based on 1676 medical students over a 10 year period compared outcomes and predictor variables of those admitted via two equity-admission pathways with those in the general admission pathway. To our knowledge, this is the first report in the literature describing programme level outcomes to this detail. The descriptive data confirm that it is possible to admit significant numbers of students via these pathways, and have most successfully complete the programme. Nearly all students with Māori and Pacific ethnicity entered via the MAPAS pathway. Furthermore, the MAPAS and ROMPE pathways each contained higher proportions of students from lower socio-economic backgrounds and students who attended schools out of Auckland. These findings underscore the importance of having equity pathways or targets, as it unlikely many of the MAPAS students, and some of the ROMPE students would have been successful in the highly competitive selection process for GENERAL students. Furthermore, to provide workforce benefit, students need to complete the programme. Encouragingly, despite marked differences in background and prior performance there was only a 12-15% difference in the proportion of MAPAS students who graduated in the study period compared to ROMPE or GENERAL admission students respectively. Our hypotheses that markers of socio-economic status, transitioning factors, bridging programme attendance and academic preparation are likely to impact on both short-term and long-term academic outcomes were confirmed, although findings are mixed within and across the entry pathways. When looking within the MAPAS cohort, the odds of a MAPAS student graduating (compared to another MAPAS student) improved with non-bridging programme attendance and most likely reflect cohort differences in admission GPA/GPE. In contrast, our findings suggest that having attended a bridging programme, entering medicine as an undergraduate and higher admission GPA/GPA are the major contributors to reducing the GPA difference observed *between* MAPAS and GENERAL students in the early, non-clinical phase of medical training.

1  
2  
3 This study represents a comprehensive analysis of academic outcomes for equity admission pathways  
4 into medicine within NZ. Similarly, this study explores academic outcomes for one of the largest  
5 cohorts of indigenous medical students available internationally. We acknowledge that this study was  
6 confined to a single medical programme and that the results may not be generalisable to other  
7 programmes or tertiary institutions. In particular, the comprehensive nature of the MAPAS  
8 programme with respect to student admission and retention support may not be reflected in other  
9 tertiary contexts.<sup>28</sup> Like similar measures elsewhere (e.g. participation of local areas (POLAR)  
10 classification in England), the use of secondary school decile as a proxy for socio-economic position  
11 relies on an area-level indicator of deprivation and may not directly reflect the socio-economic  
12 position of each individual student or their family.<sup>29</sup> Despite this, other school factors (e.g. student  
13 attainment, aspirations for future study) have been linked to school decile suggesting that individual  
14 students will have been exposed to direct school effects.<sup>29-31</sup> This study did not explore the effect of  
15 medical interview outcomes due to different processes of selection being used across equity and  
16 general admission pathways.<sup>32 33</sup> The study period spans across and before periods of significant  
17 change within the MAPAS and ROMPE pathways with respect to admissions processes (i.e. selection  
18 methods and eligibility).<sup>19 34</sup> Therefore, study findings should be interpreted cautiously as 'historical'  
19 markers of equity programme delivery or performance rather than accurate representations of the  
20 equity processes in operation today.<sup>35</sup>

21  
22  
23  
24  
25  
26  
27  
28  
29  
30  
31 Our findings are consistent with the existing literature base that GPA at the point of admission is the  
32 strongest predictor of academic outcomes within the medical programme.<sup>32 36-38</sup> In a critical appraisal  
33 of studies examining medical school failure, O'Neill and colleagues found that lower entry  
34 qualifications at admission were linked to higher failure rates. However, they note that many studies  
35 did not control for confounding factors, were mostly focused on student attributes, with few studies  
36 examining the role of the institution.<sup>39</sup> The fact that 80% of MAPAS students completed medicine  
37 despite being admitted with an average GPA approximately 2 points lower than other medical  
38 students is encouraging. This suggests that whilst GPA at admission is important, other unmeasured  
39 factors may be contributing to our findings. Student pastoral and financial issues (likely to be  
40 significant for indigenous students given their socioeconomic and demographic profile),<sup>40</sup>  
41 psychological characteristics,<sup>41</sup> student learning styles,<sup>37</sup> and relevant medical curricula or structural  
42 factors<sup>39</sup> may also play a role. As noted by Mathers and Parry, graduate applicants to medicine have  
43 complex needs arising from their personal social, family and economic circumstances that may affect  
44 their academic performance.<sup>42</sup> The UoA's commitment to respond to these student factors (via the  
45 provision of comprehensive admission, pastoral and academic support) may be contributing to our  
46 outcomes observed, particularly for graduate entry and bridging programme students admitted under  
47 MAPAS. The positive effect of bridging programme exposure has also been noted elsewhere<sup>43-47</sup>.  
48 However within the MAPAS cohort, those students who did not require additional academic support  
49 via a bridging programme experienced better academic outcomes. Therefore, our findings reinforce

1  
2  
3 the need for ongoing bridging programme delivery alongside the elimination of educational inequities  
4 for Māori and Pacific students (for more information please see  
5 [https://www.fmhs.auckland.ac.nz/en/faculty/for/future-undergraduates/undergraduate-study-  
7 options/certhsc.html](https://www.fmhs.auckland.ac.nz/en/faculty/for/future-undergraduates/undergraduate-study-<br/>6 options/certhsc.html)).<sup>34 48-51</sup> The association between secondary school decile rating (a marker of  
8 socio-economic status and school characteristics) and academic outcomes had mixed results and are  
9 unlikely to explain the differences observed by admission pathway. Although school decile has been  
10 linked to first year academic outcomes for Māori,<sup>52</sup> our findings may reflect the fact that school  
11 characteristics have been noted to have less impact on student achievement at the higher end of the  
12 achievement scale i.e. GPA  $\geq$  4.<sup>53</sup> However, the strong association between lower school decile and  
13 reduced odds of graduating for the GENERAL admission students challenges this conclusion, differs  
14 from other research<sup>39</sup> and is of concern.

15  
16  
17  
18  
19  
20  
21 Our study reinforces the existing evidence that equity-targeted admission programmes, inclusive of  
22 variations in academic threshold for entry, can support a widening participation agenda within  
23 medicine.<sup>4</sup> However, tertiary institutions and society at large must accept that ethnic inequities in  
24 educational outcomes and rural workforce development needs should be accounted for within  
25 admission pathways and retention support.<sup>48 54</sup> Providing comprehensive academic and pastoral  
26 assistance to equity-admission and lower socioeconomic students who are operating within complex  
27 and academically demanding contexts remains paramount.<sup>28 55 56</sup> Whilst differences in academic  
28 thresholds for equity groups appears necessary, it is often criticised as being 'politically correct',  
29 providing 'preferential treatment' to one group or individual over another, and has not been  
30 universally welcomed by the public or the profession.<sup>16 57-60</sup> Bacchi notes that the framing of widening  
31 participation as 'preferential treatment' "undermines the legitimacy of the reform and reduces its  
32 impact, limiting the kinds of reforms 'permitted' and alienating those who are targeted. This  
33 undoubtedly serves the interests of those who profit under current social arrangements" (p. 144).<sup>58</sup>  
34 Given this context, it is perhaps not surprising that whilst medical schools strive to increase diversity  
35 and meet the goals of a widening participation agenda, successful implementation is influenced by  
36 contextual factors associated with institutional leadership, resource allocation and external  
37 stakeholder pressure. Razack et al note that whilst the development of social accountability policy has  
38 occurred, medical schools appear to be challenged by the implementation of these policies within  
39 student recruitment and selection processes.<sup>61</sup> This study responds to calls for open and inclusive  
40 discussions in order to advance admissions practice aiming to enhance social justice and widening  
41 participation agendas.<sup>61</sup>

42  
43  
44  
45  
46  
47  
48  
49  
50  
51  
52  
53 Additional research is warranted (e.g. inclusion of secondary school outcomes, non-cognitive testing  
54 and medical interview data beyond 2012). Similarly, exploring the effect of institutional attributes  
55 should also be considered.<sup>37 39</sup> Evidence suggests that tertiary and medical school environments may  
56 have different effects on indigenous and ethnic minority students who have reported that their  
57  
58  
59  
60

1  
2  
3 ethnicity adversely affects their medical school experience,<sup>62</sup> have described experiences of racism  
4 from peers and clinical educators,<sup>28 63</sup> and are adversely effected by an 'othering' medical curriculum  
5 that either stereotypes indigenous culture and society or fails to reflect indigenous realities  
6 altogether.<sup>35 40 64 65</sup> Exploring the impact of these variables on differential academic outcomes for  
7 equity admission pathways may require qualitative methods to complement additional quantitative  
8 analyses. The impact of a widening participation agenda within medicine must also begin to look  
9 beyond the number of students admitted and graduated and extend the analysis to post-graduate  
10 clinical contexts including the effect of a diverse health workforce on patient and community  
11 outcomes.<sup>1</sup> The ultimate aim of equity-targeted admission pathways into medicine is to enhance  
12 healthcare delivery, improve health outcomes and eliminate inequities for underserved communities.  
13 Understanding when and how this can be achieved remains a challenge for many countries  
14 worldwide.  
15  
16  
17  
18  
19  
20  
21

### 22 Acknowledgments

23 The authors would like to thank additional members of the Te Hā Advisory Group for the MBChB  
24 analysis: Dr Teuila Percival; Dr Vili Nosa; Dr Malakai Ofanoa; Kate Snow; Michelle Chung; Vernon  
25 Mogol.  
26

### 27 A declaration of competing interests

28 All authors have completed the ICMJE uniform disclosure form at [www.icmje.org/coi\\_disclosure.pdf](http://www.icmje.org/coi_disclosure.pdf)  
29 and declare: no support from any organisation for the submitted work; no financial relationships with  
30 any organisations that might have an interest in the submitted work in the previous three years; no  
31 other relationships or activities that could appear to have influenced the submitted work."  
32  
33

### 34 Details of contributors

35 Dr Elana Curtis (Senior Lecturer Medical) is the guarantor of the study. She led the study design,  
36 methodological approach, interpretation of the data analysis and was the primary author for drafting  
37 the manuscript. Erena Wikaire (Research Assistant) contributed to study design and provided  
38 research assistance to obtain and clean data variables. She contributed to drafting and revising the  
39 manuscript and was responsible for producing the data tables. Dr Yannan Jiang (Senior Research  
40 Fellow) contributed to the study design and provided senior statistical expertise for data analysis. She  
41 contributed to drafting and revising the manuscript. Louise McMillan (doctoral candidate) provided  
42 junior statistical expertise and contributed to the study design and revising the manuscript. Robert  
43 Loto (Professional Teaching Fellow) contributed to the study design and provided Pacific research  
44 methodological expertise in the interpretation of the data and revising of the manuscript. Associate  
45 Professor Mark Barrow (Associate Dean Education) contributed to the study design and provided  
46 senior tertiary education expertise in the interpretation of the data, drafting and revising of the  
47 manuscript. Professor Warwick Bagg contributed to the study design and provided senior medical  
48 education expertise in the interpretation of the data, drafting and revising of the manuscript.  
49 Professor Phillippa Poole contributed to the study design and provided senior medical education  
50 expertise in the interpretation of the data, drafting and revising of the manuscript. Associate  
51 Professor Papaarangi Reid (Tumaki, Deputy Dean Māori) provided senior Māori educational,  
52 institutional and Kaupapa Māori expertise and contributed to the study design, drafting and revising  
53 the manuscript. All authors read and approved the final manuscript for submission.  
54

### 55 Ethics approval

56 The study was approved by the UoA Human Participants Ethics Committee (UAHPEC) (Reference  
57 8110). As this study used de-identified secondary administrative data, study participants were not  
58 required to give informed consent.  
59  
60

### Funding for the study

Dr Elana Curtis was supported by Te Kete Hauora, Ministry of Health (New Zealand) to conduct this research via the provision of a Research Fellowship (Contract 414953/337535/00). The Ministry of Health had no role in any of the study design; in the collection, analysis, and interpretation of data; and in the decision to submit the article for publication. All researchers were independent of the funder of this study.

All authors, external and internal, had full access to all of the data (including statistical reports and tables) in the study and can take responsibility for the integrity of the data and the accuracy of the data analysis.

### A transparency declaration

I, Dr Elana Curtis (the manuscript's guarantor) affirm that the manuscript is an honest, accurate, and transparent account of the study being reported; that no important aspects of the study have been omitted; and that any discrepancies from the study as planned (and, if relevant, registered) have been explained.

### A data sharing statement

Data sharing: no additional data available.

## References

1. Baxter C, Baxter D, Baxter M. Widening participation in medicine: moving beyond the numbers. *Medical Education* 2014;49(1):7-20.
2. Powis D, Hamilton J, McManus I. Widening access by changing the criteria for selecting medical students. *Teaching and Teacher Education* 2007;23(8):1235-45.
3. Cleland J, Nicholson S, Kelly N, et al. Taking context seriously: explaining widening access policy enactments in UK medical schools. *Medical Education* 2014;49(1):25-35.
4. Garlick PB, Brown G. Widening participation in medicine. *Brit Med J* 2008;336(7653):1111-13.
5. Cooper L, Beach M, Johnson R, et al. Delving below the surface. Understanding how race and ethnicity influence relationships in health care. *Journal of General Internal Medicine* 2006;21(Suppl. 1):21-27.
6. van Ryn M, Fu S. Paved with good intentions: do public health and human service providers contribute to racial/ethnic disparities in health? *American Journal of Public Health* 2003;93(2):248-55.
7. Betancourt J, Green A, Emilio Carrillo J, et al. Cultural Competence And Health Care Disparities: Key Perspectives and Trends. *Health Affairs* 2005;24(2):499-505.
8. Cantor JC, Miles EL, Baker LC, et al. Physician service to the uninsured: implication for affirmative action in medical education. *Inquiry* 1996;33:167-80.
9. Larkins S, Michielsen K, Iputo J, et al. Impact of selection strategies on representation of underserved populations and intention to practise: international findings. *Medical Education* 2015;49(1):60-72.
10. Whittle D, Orfield G, Silen W, et al. Educational Benefits of Diversity in Medical School: a survey of students. *Academic Medicine* 2003;78(5):460-66.
11. Hung R, McClendon J, Henderson A, et al. Student perspectives on diversity and the cultural climate at a U.S. medical school. *Academic Medicine* 2007;82(2):184-92.
12. Elam C, Johnson M, Wiggs J, et al. Elam C, Johnson M, Wiggs J, et al. Diversity in medical school: perceptions of first-year students at four Southeastern U.S. medical schools. *Academic Medicine* 2001;76(1):60-65. *Academic Medicine* 2001;76(1):60-65.
13. van Ryn M, Hardeman R, Phelan S, et al. Medical School Experiences Associated with Change in Implicit Racial Bias Among 3547 Students: A Medical Students CHANGES Study Reoprt. *Journal of General Internal Medicine* 2015 doi: 10.1007/s11606-01503447-7

14. Seyan K, Greenhalgh T, Dorling D. The standardised admission ratio for measuring widening participation in medical schools: analysis of UK medical school admissions by ethnicity, socioeconomic status, and sex. *Brit Med J* 2004;328(15):45-46.
15. Ready T. The Impact of Affirmative Action on Medical Education and the Nation's Health. In: Orfield G, Kurlaender M, eds. *Diversity Challenges Evidence on the Impact of Affirmative Action*. Cambridge: Harvard Educational Review 2001:205-19.
16. Ip H, McManus I. Increasing diversity among clinicians. Is politically correct but is costly and lacks evidence to support it. *Brit Med J* 2008;336:1082-83.
17. Bollinger L. The need for diversity in higher education. *Academic Medicine* 2003;78(5):431-36.
18. Young M, Razack S, Hanson M, et al. Calling for a broader conceptualisation of diversity: surface and deep diversity in four Canadian Medical Schools. *Academic Medicine* 2012;87(11):1-10.
19. Curtis E, Reid P. Indigenous health workforce development: Challenges and successes of the Vision 20:20 programme. *Australian & New Zealand Journal of Surgery* 2013;83:49 - 54.
20. Mitchell C, Shulruf .B, Poole P. Relationship between decile score of secondary school, the size of town of origin and career intentions of New Zealand medical students. *Journal of Primary Health Care* 2010;2(3):183-89.
21. Rabinowitz H, Diamond J, Markham F, et al. Critical factors for designing programs to increase the supply and retention of rural primary care physicians. *Journal of the American Medical Association* 2001;286(9):1041-48.
22. Mitchell C, Shulruf B, Poole P. Relationship between decile score of secondary school, the size of town of origin and career intentions of New Zealand medical students. *Journal of Primary Health Care* 2010;2(3):183-89.
23. Collins J, White G. Selection of Auckland medical students over 25 years: a time for change? *Medical Education* 1993;27(4):321-27.
24. Smith L. *Decolonizing Methodologies: Research and Indigenous Peoples*. 2nd ed. London & New York: Zed Books 2012.
25. Vaioleti T. Talanoa Research Methodology: A Developing Position on Pacific Research. *Waikato Journal of Education* 2006;12:21-34.
26. Valencia R. *The Evolution of Deficit Thinking: Educational Thought and Practice*. Washington DC: The Palmer Press 1997.
27. Mills C, Heyworth J, Rosenwax L, et al. Factors associated with the academic success of first year health science students. *Advances in Health Sciences Education* 2009;14(2):205-17. doi: <http://dx.doi.org/10.1007/s10459-008-9103-9>
28. Curtis E, Wikaire E, Kool B, et al. What helps and hinders indigenous student success in higher education health programmes: A qualitative study using the Critical Incident Technique *Higher Education Research & Development* 2014;34(3):486-500. doi: 10.1080/07294360.2014.973378
29. Engler R. *School leavers' progression to bachelors-level study. Secondary to tertiary transitions*. Wellington: Ministry of Education, 2010.
30. Thrupp M, Lupton R. Taking schools more seriously: the social justice challenge. *British Journal of Educational Studies* 2006;54:308-28.
31. Leach L, Zepke N. *Student decision-making by prospective tertiary students. A review of existing New Zealand and overseas literature*. Wellington: Ministry of Education, 2005.
32. Poole P, Shulruf B, Rudland J, et al. Comparison of UMAT scores and GPA in prediction of performance in medical school: A national study. *Medical Education* 2012;46(2):163-71.
33. Madjar I, McKinley E, Jenssen S, et al. *Towards University: Navigating NCEA Course Choices in Low-Mid Decile Schools*. Auckland: The University of Auckland, 2009.
34. Curtis E, Wikaire E, Jiang Y, et al. Quantitative analysis of a Māori and Pacific admission process on first-year health study. *BMC Medical Education* 2015;15(196):1-17.
35. Curtis E, Reid P, Jones R. *Decolonising the Academy: The process of re-presenting indigenous health in tertiary teaching and learning*. In: Cram F, Phillips H, Sauni P, et al., eds. *Māori and Pasifika Higher Education Horizons*. Bingley, U.K.: Emerald Group Publishing Limited 2014:147-66.



- 1
- 2
- 3 36. Wilkinson D, Zhang J, Byrne G, et al. Medical school selection criteria and the prediction
- 4 of academic performance. Evidence leading to change in policy and practice at the
- 5 University of Queensland. *Medical Education* 2008;188:349-54.
- 6 37. Ferguson E, James D, Madeley L. Factors associated with success in medical school:
- 7 systematic review of the literature. *Brit Med J* 2002;324:952-57.
- 8 38. Schulruf B, Poole P, Wang G, et al. How well do selection tools predict performance later
- 9 in a medical programme? *Advances in Health Sciences Education* 2012;17:615-26.
- 10 39. O'Neill L, Wallstedt B, Eika B, et al. Factors associate with dropout in medical education:
- 11 A literature review. *Medical Education* 2011;45:440 - 54.
- 12 40. Gorinski R, Abernathy G. Māori student retention and success: Curriculum, pedagogy and
- 13 relationships. In: Townsend T, Bates R, eds. Handbook of teacher education:
- 14 Globalization, standards and professionalism in times of change. Dordrecht: Springer
- 15 2007:229-40.
- 16 41. Fazey D, Fazey J. The potential for autonomy in learning: Perceptions of competence,
- 17 motivation and locus of control in first-year undergraduate students. *Studies in Higher*
- 18 *Education* 2001;26(3):345-61.
- 19 42. Mathers J, Parry J. Older mature students' experiences of applying to study medicine in
- 20 England: an interview study. *Medical Education* 2010;44(11):1084-94.
- 21 43. Burch V, Sikakana C, Gunston G, et al. Generic Learning skills in academically-at-risk
- 22 medical students: A development programme bridges the gap. *Medical Teacher*
- 23 2013;35(8):671-77.
- 24 44. Curtis E, Wikaire E, Jang Y, et al. Open to critique: predictive effects of academic
- 25 outcomes from a bridging/foundation programme on first-year degree-level study.
- 26 *Assessment & Evaluation in Higher Education* 2015:1-17. doi:
- 27 10.1080/02602938.2015.1087463
- 28 45. Strayhorn G. A pre-admission program for underrepresented minority and disadvantaged
- 29 students: application, acceptance, graduation rates and timeliness of graduating from
- 30 medical school. *Academic Medicine* 2000;75(4):355-61.
- 31 46. Strayhorn G. Participation in a premedical summer program for underrepresented-
- 32 minority students as a predictor of academic performance in the first three years of
- 33 medical school: two studies. *Academic Medicine* 1999;74(4):435-47.
- 34 47. Mathers J, Sitch A, Marsh J, et al. Widening access to medical education for under-
- 35 represented economic groups: population based cross sectional analysis of UK data,
- 36 2002-6. *Brit Med J* 2011;342:918.
- 37 48. Curtis E, Wikaire E, Stokes K, et al. Addressing indigenous health workforce inequities: A
- 38 literature review exploring 'best' practice for recruitment into tertiary health
- 39 programmes. *International Journal for Equity in Health* 2012;11(13):1-15.
- 40 49. Ratima M, Brown R, Garrett N, et al. Rauringa Raupa: Recruitment and retention of Māori
- 41 in the health and disability workforce. Auckland: Taupua Waiora: Division of Public
- 42 Health and Psychosocial Studies. Faculty of Health and Environmental Sciences:
- 43 AUT University, 2007.
- 44 50. Anderson I. Indigenous Pathways into the Professions. Commissioned Report for the
- 45 Review of Higher Education Access and Outcomes for Aboriginal and Torres Strait
- 46 Islander People. Melbourne: University of Melbourne, 2011.
- 47 51. Curtis E, Wikaire E, Jang Y, et al. A tertiary approach to improving equity in health:
- 48 Quantitative analysis of the Māori and Pacific Admission Scheme (MAPAS) process,
- 49 2008-2012. *International Journal for Equity in Health* 2015;14(7):1-15. doi:
- 50 10.1186/s12939-015-0133-7
- 51 52. Earle D. Hei titiro anō i te whāinga. Māori achievement in bachelors degrees revisited.
- 52 Wellington: Ministry of Education, 2008.
- 53 53. Schulruf B, Hattie J, Tumen S. Individual and school factors affecting student's
- 54 participation and success in higher education. *Higher Education* 2008;56(5):613-32.
- 55 54. Poole P, Moriarty H, Wearn A, et al. Medical Student Selection in New Zealand: Looking
- 56 to the future. *New Zealand Medical Journal* 2009;122(1306):88-100.
- 57 55. Spencer A, Young T, Williams S, et al. Survey on Aboriginal issues within Canadian
- 58 medical programmes. *Medical Education* 2005;39(11):1101-9.
- 59 56. Whiteford G, Shah M, Nair C. Equity and excellence are not mutually exclusive: A
- 60 discussion of academic standards in an era of widening participation. *Quality*
- Assurance in Education* 2013;21(3):299-310.

- 1
- 2
- 3 57. Reiter H, MacCoon K. A compromise method to facilitate under-represented minority
- 4 admissions into medical school. *Advances in Health Sciences Education*
- 5 2007;12(2):223-37.
- 6 58. Bacchi C. Policy and discourse: challenging the construction of affirmative action as
- 7 preferential treatment. *Journal of European Public Policy* 2004;11(1 February):128-
- 8 46.
- 9 59. Reiter H, Maccoon K. A compromise method to facilitate under-represented minority
- 10 admissions into medical school. *Advances in Health Sciences Education*
- 11 2007;12:223-37.
- 12 60. Mathers J, Sitch A, Marsh J, et al. Widening access to medical education for under-
- 13 represented economic groups: population based cross sectional analysis of UK data,
- 14 2002-6. *British Medical Journal* 2011;341:1-7.
- 15 61. Razack S, Maguire M, Hodges B, et al. What might we be saying to potential applicants to
- 16 medical school? Discourses of excellence, equity, and diversity on the web sites of
- 17 Canada's 17 medical schools. *Academic Medicine* 2012;87(10):1323-29.
- 18 62. Dyrbye L, Thomas M, Eacker A, et al. Race, ethnicity, and medical student well-being in
- 19 the United States. *Archives of Internal Medicine* 2007;167(19):2103-09.
- 20 63. Garvey G, Rolfe I, Pearson S, et al. Indigenous Australian medical students' perceptions
- 21 of their medical school training. *Medical Education* 2009;43(11):1047-55.
- 22 64. Chauvel F, Rean J. Doing better for Māori in tertiary settings. Wellington: Tertiary
- 23 Education Commission, 2012.
- 24 65. Mayeda D, Keil M, Dutton H, et al. "You've Gotta Set A Precedent". Māori and Pacific
- 25 voices on student success in higher education. *ALTERNATIVE* 2014;10(2):165-79.
- 26
- 27
- 28
- 29
- 30
- 31
- 32
- 33
- 34
- 35
- 36
- 37
- 38
- 39
- 40
- 41
- 42
- 43
- 44
- 45
- 46
- 47
- 48
- 49
- 50
- 51
- 52
- 53
- 54
- 55
- 56
- 57
- 58
- 59
- 60

Figure 1: Conceptual model and multiple regression analysis plan with stepwise model selection. [See separate attachment]

Table 1: Descriptive variables for GENERAL, MAPAS and ROMPE admission categories 2002 – 2009.

| Descriptive summary variables    | Admission category |       |               |       |         |               |       |                |         |       |
|----------------------------------|--------------------|-------|---------------|-------|---------|---------------|-------|----------------|---------|-------|
|                                  | GENERAL (n=778)    |       | MAPAS (n=183) |       | p-value | ROMPE (n=121) |       | Total (n=1082) |         |       |
| Categorical variables            | n                  | %     | n             | %     |         |               | n     | %              | p-value | n     |
| Female                           | 427                | 54.88 | 103           | 56.28 | 0.7319  | 76            | 62.81 | 0.1023         | 606     | 56.01 |
| Ethnicity                        |                    |       |               |       | <.0001  |               |       | <.0001         |         |       |
| Māori                            | 20                 | 2.57  | 102           | 55.74 |         | 2             | 1.65  |                | 124     | 11.46 |
| Pacific                          | 14                 | 1.80  | 79            | 43.17 |         | 2             | 1.65  |                | 95      | 8.78  |
| Asian                            | 339                | 43.57 | 1             | 0.55  |         | 12            | 9.92  |                | 352     | 32.53 |
| Other                            | 44                 | 5.66  | 1             | 0.55  |         | 3             | 2.48  |                | 48      | 4.44  |
| Pākehā/European                  | 348                | 44.73 | 0             | 0.00  |         | 99            | 81.82 |                | 447     | 41.31 |
| Missing/No response              | 13                 | 1.68  | 0             | 0.00  |         | 3             | 2.48  |                | 16      | 1.48  |
| School decile rating             |                    |       |               |       | <.0001  |               |       | <.0001         |         |       |
| High                             | 545                | 70.05 | 80            | 43.72 |         | 54            | 44.63 |                | 679     | 62.75 |
| Medium                           | 159                | 20.44 | 54            | 29.51 |         | 48            | 39.67 |                | 261     | 24.12 |
| Low                              | 24                 | 3.08  | 38            | 20.77 |         | 9             | 7.44  |                | 71      | 6.56  |
| Missing                          | 50                 | 6.43  | 11            | 6.01  |         | 10            | 8.26  |                | 71      | 6.56  |
| Attended school in Auckland      | 565                | 72.62 | 115           | 62.84 | 0.0017  | 48            | 39.67 | <.0001         | 728     | 67.28 |
| Completed bridging programme     | 8                  | 1.03  | 41            | 22.40 | <.0001  | 1             | 0.83  | 1.0000         | 50      | 4.62  |
| Admitted as School leaver (yr 1) | 565                | 72.62 | 91            | 49.73 | <.0001  | 78            | 64.46 | 0.0643         | 734     | 67.84 |
| Entry pathway                    |                    |       |               |       | 0.5200  |               |       | 0.0001         |         |       |
| Graduate                         | 121                | 15.55 | 32            | 17.49 |         | 36            | 29.75 |                | 189     | 17.47 |
| Undergraduate (UG)               | 657                | 84.45 | 151           | 82.51 |         | 85            | 70.25 |                | 893     | 82.53 |
| Graduated (yes)                  | 735                | 94.47 | 146           | 79.78 | <.0001  | 111           | 91.74 | 0.2343         | 992     | 91.68 |
| Continuous variables             | Mean               | SD    | Mean          | SD    |         | Mean          | SD    |                | Mean    | SD    |
| Age at admission (yr 2)          | 20.02              | 3.10  | 20.98         | 3.97  | 0.0014  | 21.07         | 3.80  | 0.0041         | 20.3    | 3.37  |
| Admission GPA/GPE                | 8.12               | 0.99  | 6.04          | 1.29  | <0.0001 | 7.72          | 0.88  | 0.0002         | 7.72    | 1.29  |

Cohort 2002-9 comprises students who matriculated into Year 2 of the MBCHB (or Bachelor of Human Biology BHB) programme within FMHS from 2002 to 2009 inclusive, excluding international entry students. Students who repeated Year 2 have been recorded in their first Year 2 year. All variables have been compared for the General vs. MAPAS categories and for the General vs. RRAS categories. Categorical variables have been tested using Chi-squared test, or Fisher's exact test where necessary. Continuous variables have been tested using the ANOVA model, with adjustment for multiple comparisons.

Table 2: Multiple regression results for Graduated (2002-2009 cohort) and Year 2-3 GPA (2002–2012 cohort) academic outcomes.

| Model  | Predictor variable (ref)     | Comparison                    | Graduated (n=1082)<br>(2002 - 2009 cohort) |         |              | Year 2-3 GPA (n=1676)<br>(2002 – 2012 cohort) |                 |                |                |
|--------|------------------------------|-------------------------------|--------------------------------------------|---------|--------------|-----------------------------------------------|-----------------|----------------|----------------|
|        |                              |                               | Overall p-value                            | OR      | 95% CI       | Overall p-value                               | Mean difference | 95% CI         |                |
| Unadj. | Admission category (GENERAL) | MAPAS                         | <.0001                                     | 0.23    | (0.14, 0.37) | <.0001                                        | -1.93           | (-2.11,-1.76)  |                |
|        |                              | ROMPE                         |                                            | 0.65    | (0.32, 1.33) |                                               | -0.45           | (-0.67,-0.23)  |                |
| 1      | Admission category (GENERAL) | MAPAS                         | <.0001                                     | 0.24    | (0.14, 0.39) | <.0001                                        | -1.99           | (-2.17,-1.82)  |                |
|        |                              | ROMPE                         |                                            | 0.70    | (0.33, 1.50) |                                               | -0.54           | (-0.76,-0.32)  |                |
| 2      | Admission category (GENERAL) |                               |                                            | n=1011* |              |                                               | n=1586*         |                |                |
|        |                              | MAPAS                         | 0.0001                                     | 0.29    | (0.16, 0.51) | <.0001                                        | -1.94           | (-2.12, -1.75) |                |
|        |                              | ROMPE                         |                                            | 0.63    | (0.28, 1.44) |                                               | -0.54           | (-0.77, -0.31) |                |
|        | School decile (High 8-10)    | Medium (4-7)                  | 0.0032                                     | 0.56    | (0.32, 0.98) | 0.0279                                        | -0.16           | (-0.32, -0.00) |                |
|        |                              | Low (1-3)                     |                                            | 0.29    | (0.14, 0.61) |                                               | -0.32           | (-0.61, -0.03) |                |
|        |                              |                               |                                            |         |              |                                               |                 |                |                |
| 3      | Admission category (GENERAL) | MAPAS                         | 0.0002                                     | 0.30    | (0.17, 0.53) | <.0001                                        | -1.89           | (-2.08, -1.70) |                |
|        |                              | ROMPE                         |                                            | 0.48    | (0.21, 1.12) |                                               | -0.53           | (-0.76, -0.31) |                |
|        |                              | School decile (High 8-10)     | 0.0022                                     | 0.52    | (0.29, 0.93) | 0.0454                                        | -0.15           | (-0.31, 0.00)  |                |
|        |                              | Low (1-3)                     |                                            | 0.28    | (0.13, 0.59) |                                               | -0.29           | (-0.58, -0.00) |                |
|        | Auckland school (Yes)        | No                            | 0.0030                                     | 2.67    | (1.40, 5.09) | -                                             | -               | -              |                |
|        |                              | Type of admission (SL)        | AA                                         | 0.0430  | 0.53         | (0.29, 0.10)                                  | 0.0004          | -0.34          | (-0.53, -0.15) |
|        |                              |                               |                                            |         |              |                                               |                 |                |                |
| 4      | Admission category (GENERAL) | MAPAS                         | 0.0182                                     | 0.44    | (0.23, 0.84) | <.0001                                        | -1.72           | (-1.91, -1.53) |                |
|        |                              | ROMPE                         |                                            | 0.42    | (0.18, 0.10) |                                               | -0.61           | (-0.83, -0.39) |                |
|        |                              | School decile (High 8-10)     | 0.0096                                     | 0.58    | (0.32, 1.05) | -                                             | -               | -              |                |
|        |                              | Low (1-3)                     |                                            | 0.31    | (0.14, 0.68) | -                                             | -               | -              |                |
|        |                              | Auckland school (Yes)         | No                                         | 0.0062  | 2.52         | (1.30, 4.88)                                  | -               | -              | -              |
|        |                              | Type of admission (SL)        | AA                                         | -       | -            | -                                             | -               | -              | -              |
| 5      | Admission category (GENERAL) | Bridging Programme (No)       | <.0001                                     | 0.16    | (0.07, 0.36) | <.0001                                        | -1.24           | (-1.56, -0.91) |                |
|        |                              | MAPAS                         | 0.1251                                     | 1.68    | (0.74, 3.83) | 0.1306                                        | 0.10            | (-0.10, 0.31)  |                |
|        |                              | ROMPE                         |                                            | 0.56    | (0.23, 1.37) |                                               | -0.14           | (-0.33, 0.04)  |                |
|        |                              | School decile (High 8-10)     | 0.0276                                     | 0.66    | (0.35, 1.23) | -                                             | -               | -              |                |
|        |                              | Low (1-3)                     |                                            | 0.31    | (0.13, 0.74) | -                                             | -               | -              |                |
|        |                              | Auckland school (Yes)         | No                                         | 0.0030  | 2.88         | (1.43, 5.79)                                  | -               | -              | -              |
|        | Type of admission (SL)       | AA                            | -                                          | -       | -            | -                                             | -               | -              |                |
|        |                              | Bridging Programme (No)       | <.0001                                     | 0.17    | (0.07, 0.40) | <.0001                                        | -0.90           | (-1.18, -0.61) |                |
|        |                              | Entry pathway (Undergraduate) | Graduate                                   | 0.0100  | 0.45         | (0.24, 0.82)                                  | <.0001          | 0.47           | (0.31, 0.64)   |
|        | Admission GPA/GPE            | per point increase            | <.0001                                     | 1.95    | (1.55, 2.45) | <.0001                                        | 0.89            | (0.82, 0.95)   |                |

\* n is the total number in the cohort, number used is the number of students who have complete data for the given model (all other students are excluded from the analysis). In the Total Cohort, 90 did not graduate whereas 992 graduated. Model #2 – 5 cohort sizes reduced to 1011 and 1586 respectively due to missing school decile data; fewer students were excluded due to missing data for the remaining predictors. Logistic regression model applied to graduation outcome, linear regression model applied to Year2-3 GPA outcome. All regression models have controlled for year of admission, gender and age at admission. Pre-defined predictors were added to the baseline model in sequential order to estimate their joint independent effects on the outcome. All models include the predictor Admission Category. Each model was initially run with all the specified predictors, then re-run with stepwise selection to include significant predictors only and obtain final estimates of effect size. Model-adjusted estimates of odds ratio or mean difference (compared to the reference level), 95% confidence intervals (CI) and associated individual p-values (in symbols) were reported.

Table 3:

## (a) Logistic regression results for Graduated (2002-2009 cohort) academic outcome for MAPAS and GENERAL subgroups.

| Model | Predictor variable (ref)                                                                 | Comparison                    | Graduated (2002 - 2009 cohort)<br>MAPAS (n=181) |               |                | Graduated (2002 - 2009 cohort)<br>GENERAL (n=778) |               |               |   |   |   |
|-------|------------------------------------------------------------------------------------------|-------------------------------|-------------------------------------------------|---------------|----------------|---------------------------------------------------|---------------|---------------|---|---|---|
|       |                                                                                          |                               | Overall p-value                                 | OR            | 95% CI         | Overall p-value                                   | OR            | 95% CI        |   |   |   |
| 1     | <b>Ethnicity</b><br>(reference group Māori for<br>MAPAS, Pākehā/European for<br>GENERAL) | Māori                         | -                                               | -             | -              | 0.0010                                            | 0.175         | (0.047,0.648) |   |   |   |
|       |                                                                                          | Pacific                       | 0.0035                                          | 0.285         | (0.123,0.662)  | -                                                 | 0.089         | (0.023,0.339) |   |   |   |
|       |                                                                                          | Asian                         | -                                               | -             | -              | -                                                 | 0.657         | (0.286,1.508) |   |   |   |
|       |                                                                                          | Other/Missing                 | -                                               | -             | -              | -                                                 | 0.316         | (0.106,0.940) |   |   |   |
| 5     | <b>School decile (High 8-10)</b>                                                         | Medium (4-7)                  | -                                               | -             | -              | 0.0098                                            | 0.384         | (0.164,0.898) |   |   |   |
|       |                                                                                          | Low (1-3)                     | -                                               | -             | -              |                                                   |               |               |   |   |   |
|       |                                                                                          | Auckland school (Yes)         | -                                               | -             | -              |                                                   |               |               |   |   |   |
|       |                                                                                          | Type of admission (SL)        | 0.0127                                          | 4.571         | (1.256,16.629) |                                                   |               |               | - | - | - |
|       |                                                                                          | Bridging Programme (No)       | -                                               | -             | -              |                                                   |               |               | - | - | - |
|       |                                                                                          | Entry pathway (Undergraduate) | 0.0014                                          | 0.141         | (0.042,0.468)  |                                                   |               |               | - | - | - |
|       |                                                                                          | Admission GPA/GPE             | 0.0123                                          | 0.170         | (0.043,0.681)  |                                                   |               |               | - | - | - |
|       | per point increase                                                                       | 0.0319                        | 1.758                                           | (1.050,2.994) | <.0001         | 2.020                                             | (1.460,2.796) |               |   |   |   |

Logistic regression model has controlled for year of admission, gender and age at admission. Pre-defined predictors were added to the baseline model in sequential order to estimate their joint independent effects on the outcome. Each model was initially run with all the specified predictors, then re-run with stepwise selection to include significant predictors only and obtain final estimates of effect size. Model-adjusted estimates of odds ratios (compared to the reference level), 95% confidence intervals (CI) and associated individual p-values (in symbols) were reported.

## (b) Linear regression results for Year 2-3 GPA (2002–2012 cohort) academic outcome for MAPAS and GENERAL subgroups.

| Model | Predictor variable (ref)                                                                 | Comparison                    | Year 2-3 GPA (2002 – 2012 cohort)<br>MAPAS (n=315) |                 |                 | Year 2-3 GPA (2002 – 2012 cohort)<br>GENERAL (n=1167) |                 |                 |   |       |               |
|-------|------------------------------------------------------------------------------------------|-------------------------------|----------------------------------------------------|-----------------|-----------------|-------------------------------------------------------|-----------------|-----------------|---|-------|---------------|
|       |                                                                                          |                               | Overall p-value                                    | Mean difference | 95% CI          | Overall p-value                                       | Mean difference | 95% CI          |   |       |               |
| 1     | <b>Ethnicity</b><br>(reference group Māori for<br>MAPAS, Pākehā/European for<br>GENERAL) | Māori                         | -                                                  | -               | -               | <.0001                                                | -0.616          | (-1.201,-0.031) |   |       |               |
|       |                                                                                          | Pacific                       | 0.0109                                             | -0.425          | (-1.018,0.168)  | -                                                     | -2.226          | (-2.939,-1.513) |   |       |               |
|       |                                                                                          | Asian                         | -                                                  | -               | -               | -                                                     | -0.191          | (-0.358,-0.025) |   |       |               |
|       |                                                                                          | Other/Missing                 | -                                                  | -               | -               | -                                                     | -0.524          | (-0.852,-0.196) |   |       |               |
| 5     | <b>School decile (High 8-10)</b>                                                         | Medium (4-7)                  | -                                                  | -               | -               | 0.0036                                                | -1.083          | (-1.812,-0.355) |   |       |               |
|       |                                                                                          | Low (1-3)                     | -                                                  | -               | -               |                                                       |                 |                 |   |       |               |
|       |                                                                                          | Auckland school (Yes)         | -                                                  | -               | -               |                                                       |                 |                 |   |       |               |
|       |                                                                                          | Type of admission (SL)        | -                                                  | -               | -               |                                                       |                 |                 |   |       |               |
|       |                                                                                          | Bridging Programme (No)       | <.0001                                             | -0.927          | (-1.209,-0.654) |                                                       |                 |                 | < | 0.577 | (0.377,0.777) |
|       |                                                                                          | Entry pathway (Undergraduate) | -                                                  | -               | -               |                                                       |                 |                 | < | 0.977 | (0.891,1.063) |
|       |                                                                                          | Admission GPA/GPE             | <.0001                                             | 0.754           | (0.647,0.861)   |                                                       |                 |                 | < |       |               |
|       | per point increase                                                                       | <.0001                        | 0.754                                              | (0.647,0.861)   | <.0001          | 0.977                                                 | (0.891,1.063)   |                 |   |       |               |

Linear regression model has controlled for year of admission, gender and age at admission. Pre-defined predictors were added to the baseline model in sequential order to estimate their joint independent effects on the outcome. Each model was initially run with all the specified predictors, then re-run with stepwise selection to include significant predictors only and obtain final estimates of effect size. Model-adjusted estimates of mean difference (compared to the reference level), 95% confidence intervals (CI) and associated individual p-values (in symbols) were reported.

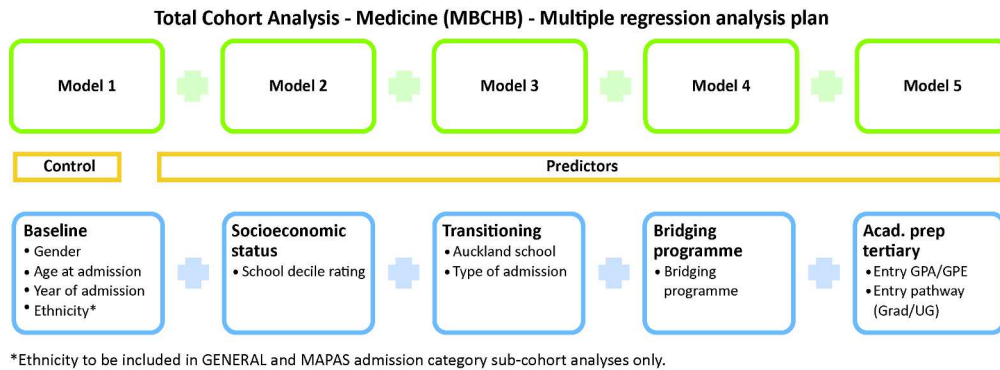

Figure 1: Conceptual model and multiple regression analysis plan with stepwise model selection.

248x90mm (300 x 300 DPI)

Peer review only

## STROBE Statement—checklist of items that should be included in reports of observational studies

|                              | Item No | Recommendation                                                                                                                                                                                                                                                                                                                                                                                             |
|------------------------------|---------|------------------------------------------------------------------------------------------------------------------------------------------------------------------------------------------------------------------------------------------------------------------------------------------------------------------------------------------------------------------------------------------------------------|
| <b>Title and abstract</b>    | 1       | <p>(a) Indicate the study's design with a commonly used term in the title or the abstract<br/><b>Pg.1, Line 5.</b></p> <p>(b) Provide in the abstract an informative and balanced summary of what was done and what was found<br/><b>Pg.2, Lines 6-37.</b></p>                                                                                                                                             |
| <b>Introduction</b>          |         |                                                                                                                                                                                                                                                                                                                                                                                                            |
| Background/rationale         | 2       | Explain the scientific background and rationale for the investigation being reported<br><b>Pgs.4, Lines 3-58, Pg.5, Lines 3-29.</b>                                                                                                                                                                                                                                                                        |
| Objectives                   | 3       | State specific objectives, including any prespecified hypotheses<br><b>Pg.6, Lines 46-52, Figure 1 Pg. 18, Pg.5, Lines 20-25.</b>                                                                                                                                                                                                                                                                          |
| <b>Methods</b>               |         |                                                                                                                                                                                                                                                                                                                                                                                                            |
| Study design                 | 4       | Present key elements of study design early in the paper<br><b>Pg.4, Lines 37-41.</b>                                                                                                                                                                                                                                                                                                                       |
| Setting                      | 5       | Describe the setting, locations, and relevant dates, including periods of recruitment, exposure, follow-up, and data collection<br><b>Pg.4, Lines 37-58, Pg.5, Lines 3-20.</b>                                                                                                                                                                                                                             |
| Participants                 | 6       | <p>(a) <i>Cross-sectional study</i>—Give the eligibility criteria, and the sources and methods of selection of participants<br/><b>Pg. 5, Lines 34-46.</b></p> <p>(b) <i>Cohort study</i>—For matched studies, give matching criteria and number of exposed and unexposed – N/a</p> <p><i>Case-control study</i>—For matched studies, give matching criteria and the number of controls per case – N/a</p> |
| Variables                    | 7       | Clearly define all outcomes, exposures, predictors, potential confounders, and effect modifiers. Give diagnostic criteria, if applicable<br><b>Pg. 6, Lines 4-40.</b>                                                                                                                                                                                                                                      |
| Data sources/<br>measurement | 8*      | For each variable of interest, give sources of data and details of methods of assessment (measurement). Describe comparability of assessment methods if there is more than one group<br><b>Pg.5, Lines 34-58, Pg.6, Pg. 7, Lines 4-28.</b>                                                                                                                                                                 |
| Bias                         | 9       | Describe any efforts to address potential sources of bias<br><b>Pg. 7, Lines 7-28.</b>                                                                                                                                                                                                                                                                                                                     |
| Study size                   | 10      | Explain how the study size was arrived at<br><b>Pg. 5, Lines 43-46. The study size was based on the maximum study period available given availability of electronic data for analysis.</b>                                                                                                                                                                                                                 |
| Quantitative variables       | 11      | Explain how quantitative variables were handled in the analyses. If applicable, describe which groupings were chosen and why<br><b>Pg. 6, Lines 4-58.</b>                                                                                                                                                                                                                                                  |
| Statistical methods          | 12      | <p>(a) Describe all statistical methods, including those used to control for confounding<br/><b>Pg. 6, Lines 43-58, Pg. 7, Lines 4-28.</b></p> <p>(b) Describe any methods used to examine subgroups and interactions<br/><b>Pg. 6, Lines 43-58, Pg. 7, Lines 4-28.</b></p> <p>(c) Explain how missing data were addressed</p>                                                                             |

1  
2  
3  
4  
5  
6  
7  
8  
9  
10  
11  
12  
13  
14  
15  
16  
17  
18  
19  
20  
21  
22  
23  
24  
25  
26  
27  
28  
29  
30  
31  
32  
33  
34  
35  
36  
37  
38  
39  
40  
41  
42  
43  
44  
45  
46  
47  
48  
49  
50  
51  
52  
53  
54  
55  
56  
57  
58  
59  
60

**Pg. 7, Lines 27-28.**

---

(d) *Cross-sectional study*—If applicable, describe analytical methods taking account of sampling strategy

**Pg. 6, Lines 43-58, Pg. 7, Lines 4-28.**

---

(e) Describe any sensitivity analyses

No sensitivity analyses were conducted.

Continued on next page

For peer review only



**Results**

|                  |     |                                                                                                                                                                                                                                                                                                                                                                    |
|------------------|-----|--------------------------------------------------------------------------------------------------------------------------------------------------------------------------------------------------------------------------------------------------------------------------------------------------------------------------------------------------------------------|
| Participants     | 13* | (a) Report numbers of individuals at each stage of study—eg numbers potentially eligible, examined for eligibility, confirmed eligible, included in the study, completing follow-up, and analysed<br><b>See Tables. Pgs 19-22</b>                                                                                                                                  |
|                  |     | (b) Give reasons for non-participation at each stage<br><b>See Table notes. Pgs. 19-22</b>                                                                                                                                                                                                                                                                         |
|                  |     | (c) Consider use of a flow diagram<br><b>N/a.</b>                                                                                                                                                                                                                                                                                                                  |
| Descriptive data | 14* | (a) Give characteristics of study participants (eg demographic, clinical, social) and information on exposures and potential confounders<br><b>Table 1. Pg.19, Table 2, Pg. 20</b>                                                                                                                                                                                 |
|                  |     | (b) Indicate number of participants with missing data for each variable of interest<br><b>Pg. 7, Lines 27-28. Within descriptive summary tables: Table 1. Pg.19, Table 2, Pg. 20</b>                                                                                                                                                                               |
|                  |     | (c) <i>Cohort study</i> —Summarise follow-up time (eg, average and total amount) – <b>N/a</b>                                                                                                                                                                                                                                                                      |
| Outcome data     | 15* | <i>Cohort study</i> —Report numbers of outcome events or summary measures over time - <b>(N/a)</b>                                                                                                                                                                                                                                                                 |
|                  |     | <i>Case-control study</i> —Report numbers in each exposure category, or summary measures of exposure - <b>(N/a)</b>                                                                                                                                                                                                                                                |
|                  |     | <i>Cross-sectional study</i> —Report numbers of outcome events or summary measures<br><b>Table 1. Pg.19, Table 2, Pg. 20</b>                                                                                                                                                                                                                                       |
| Main results     | 16  | (a) Give unadjusted estimates and, if applicable, confounder-adjusted estimates and their precision (eg, 95% confidence interval). Make clear which confounders were adjusted for and why they were included<br><b>Pg.7, Lines 33-58, Pg. 8, Pg.9, Pg. 10, Lines 3-18.</b>                                                                                         |
|                  |     | (b) Report category boundaries when continuous variables were categorized<br><b>See Table notes. Table 1. Pg.19, Table 2, Pg. 20</b>                                                                                                                                                                                                                               |
|                  |     | (c) If relevant, consider translating estimates of relative risk into absolute risk for a meaningful time period<br><b>N/a</b>                                                                                                                                                                                                                                     |
| Other analyses   | 17  | Report other analyses done—eg analyses of subgroups and interactions, and sensitivity analyses<br><b>See Pg. 7, Lines 20-28. We ran subgroup analysis by admission category (MAPAS, GENERAL) and the differences between sub-cohorts were tested in the main model. Because we had total cohort available for analysis, no sensitivity analysis was conducted.</b> |

**Discussion**

|                  |    |                                                                                                                                                                                                                             |
|------------------|----|-----------------------------------------------------------------------------------------------------------------------------------------------------------------------------------------------------------------------------|
| Key results      | 18 | <b>Summarise key results with reference to study objectives<br/>Pg.10, Lines 21-55.</b>                                                                                                                                     |
| Limitations      | 19 | Discuss limitations of the study, taking into account sources of potential bias or imprecision. Discuss both direction and magnitude of any potential bias<br><b>Pg.11, Lines 6-26.</b>                                     |
| Interpretation   | 20 | Give a cautious overall interpretation of results considering objectives, limitations, multiplicity of analyses, results from similar studies, and other relevant evidence<br><b>Pg.11, Lines 29-58, Pg.12, Lines 3-13.</b> |
| Generalisability | 21 | Discuss the generalisability (external validity) of the study results<br><b>Pg.11, Lines 6-58. Pg.12, Lines 3-13.</b>                                                                                                       |

**Other information**

|         |    |                                                                                                  |
|---------|----|--------------------------------------------------------------------------------------------------|
| Funding | 22 | Give the source of funding and the role of the funders for the present study and, if applicable, |
|---------|----|--------------------------------------------------------------------------------------------------|

1  
2 for the original study on which the present article is based

3 **Pg. 13, Lines 55-58, Pg.14, Lines 3-4.**

4  
5 \*Give information separately for cases and controls in case-control studies and, if applicable, for exposed and  
6 unexposed groups in cohort and cross-sectional studies.  
7

8  
9 **Note:** An Explanation and Elaboration article discusses each checklist item and gives methodological background and  
10 published examples of transparent reporting. The STROBE checklist is best used in conjunction with this article (freely  
11 available on the Web sites of PLoS Medicine at <http://www.plosmedicine.org/>, Annals of Internal Medicine at  
12 <http://www.annals.org/>, and Epidemiology at <http://www.epidem.com/>). Information on the STROBE Initiative is  
13 available at [www.strobe-statement.org](http://www.strobe-statement.org).  
14  
15  
16  
17  
18  
19  
20  
21  
22  
23  
24  
25  
26  
27  
28  
29  
30  
31  
32  
33  
34  
35  
36  
37  
38  
39  
40  
41  
42  
43  
44  
45  
46  
47  
48  
49  
50  
51  
52  
53  
54  
55  
56  
57  
58  
59  
60
